# Supplementary material
Source: PubMed Central journal article supplement (PMC5800308)
Supplement: NIHMS901403-supplement-Supplement1.pdf [file NIHMS901403-supplement-Supplement1.pdf]

## Supplementary Appendix

This appendix has been provided by the authors to give readers additional information about their work.

Supplement to: Dewey FE, Gusarova V, Dunbar RL, et al. Genetic and pharmacologic inactivation of ANGPTL3 and cardiovascular disease. *N Engl J Med* 2017;377:211-21. DOI: 10.1056/NEJMoa1612790

## SUPPLEMENTARY APPENDIX: GENETIC AND PHARMACOLOGIC INACTIVATION OF ANGPTL3 AND CARDIOVASCULAR DISEASE

|                                                                                                                                                                           |           |
|---------------------------------------------------------------------------------------------------------------------------------------------------------------------------|-----------|
| <b>Authors</b>                                                                                                                                                            | <b>2</b>  |
| Affiliations: .....                                                                                                                                                       | 3         |
| <b>Supplementary Methods</b>                                                                                                                                              | <b>4</b>  |
| Population Studies of <i>ANGPTL3</i> Loss-of-Function Variants and Coronary Artery Disease.....                                                                           | 4         |
| Sequencing of <i>ANGPTL3</i> and Identification of Loss-of-Function Variants.....                                                                                         | 7         |
| Analysis of Associations of <i>ANGPTL3</i> Loss-of-Function Variants with Lipid Levels and Coronary Artery Disease.....                                                   | 8         |
| Quantification of <i>ANGPTL3</i> Protein Abundance.....                                                                                                                   | 8         |
| Antibodies .....                                                                                                                                                          | 9         |
| Animal Studies.....                                                                                                                                                       | 9         |
| Histological Assessment of Atherosclerosis in APOE*3Leiden.CETP Mice Treated with Evinacumab or Control Antibody .....                                                    | 11        |
| Evinacumab Clinical Trial Oversight and Participants.....                                                                                                                 | 12        |
| <b>Supplementary Figures</b>                                                                                                                                              | <b>14</b> |
| Figure S1. Patient disposition in R1500-HV-1214: Part A .....                                                                                                             | 14        |
| Figure S2. Effects of Inhibition of <i>ANGPTL3</i> with a Monoclonal Antibody in Human Volunteers on HDL-C. ....                                                          | 15        |
| Figure S3. Effects of Inhibition of <i>ANGPTL3</i> with a Monoclonal Antibody in Human Volunteers on LDL-C. ....                                                          | 16        |
| <b>Supplementary Tables</b>                                                                                                                                               | <b>17</b> |
| Table S1. Diagnosis, procedure, and laboratory code components of coronary artery disease case definition in DiscovEHR..                                                  | 17        |
| Table S2. Study Populations For Association Between Loss of Function Variants in <i>ANGPTL3</i> And Coronary Artery Disease ..                                            | 23        |
| Table S3. Loss of Function Variants in <i>ANGPTL3</i> .....                                                                                                               | 24        |
| Table S4. Clinical Characteristics of DiscovEHR Participants According to <i>ANGPTL3</i> Loss-of-Function Variant Status .....                                            | 25        |
| Table S5. Associations Between Loss of Function Variants in <i>ANGPTL3</i> And Fasting Lipid Levels in DiscovEHR .....                                                    | 26        |
| Table S6. Associations Between Individual Loss of Function Variants in <i>ANGPTL3</i> And Fasting Lipid Levels in DiscovEHR .....                                         | 27        |
| Table S7. Associations Between Individual Loss of Function Variants in <i>ANGPTL3</i> And Coronary Artery Disease in DiscovEHR .....                                      | 28        |
| Table S8. Baseline Demographics and Clinical Characteristics of Healthy Volunteers Treated with SQ Evinacumab.....                                                        | 29        |
| Table S9. Baseline Demographics and Clinical Characteristics of Healthy Volunteers Treated with IV Evinacumab.....                                                        | 30        |
| Table S10. Summary of Treatment Emergent Adverse Events in Healthy Volunteers Treated with Evinacumab .....                                                               | 31        |
| Table S11. Summary of TEAEs by System Organ Class and Preferred Term – Subjects in Group A (All Subjects).....                                                            | 32        |
| Table S12. Summary of Triglyceride (mg/dL) Percent Change from Baseline by Dose Level by Visit Subjects in Group A (Safety Analysis Set) Treated with SC Evinacumab.....  | 37        |
| Table S13. Summary of Triglyceride (mg/dL) Percent Change from Baseline by Dose Level by Visit Subjects in Group A (Safety Analysis Set) Treated with IV Evinacumab ..... | 38        |
| Table S14. Summary of LDL-C (mg/dL) Percent Change from Baseline by Dose Level by Visit Subjects in Group A (Safety Analysis Set) Treated with SC Evinacumab.....         | 39        |
| Table S15. Summary of LDL-C (mg/dL) Percent Change from Baseline by Dose Level by Visit Subjects in Group A (Safety Analysis Set) Treated with IV Evinacumab .....        | 40        |
| Table S16. Summary of HDL-C (mg/dL) Percent Change from Baseline by Dose Level by Visit Subjects in Group A (Safety Analysis Set) Treated with SC Evinacumab.....         | 41        |
| Table S17. Summary of HDL-C (mg/dL) Percent Change from Baseline by Dose Level by Visit Subjects in Group A (Safety Analysis Set) Treated with IV Evinacumab .....        | 42        |
| <b>References</b>                                                                                                                                                         | <b>43</b> |

## **Authors**

<sup>1</sup>Frederick E. Dewey M.D., <sup>2</sup>Viktoria Gusarova Ph.D., <sup>3</sup>Richard L. Dunbar M.D., <sup>1</sup>Colm O'Dushlaine Ph.D., <sup>1</sup>Claudia Schurmann Ph.D., <sup>1</sup>Omri Gottesman M.D., <sup>1</sup>Shane McCarthy Ph.D., <sup>1</sup>Cristopher V. Van Hout Ph.D., <sup>1</sup>Shannon Bruse Ph.D., <sup>2</sup>Hayes M. Dansky M.D., <sup>4</sup>Joseph B. Leader, B.A., <sup>4</sup>Michael F. Murray, M.D., <sup>4</sup>Marylyn D. Ritchie, Ph.D., <sup>4</sup>H. Lester Kirchner, Ph.D., <sup>1</sup>Lukas Habegger Ph.D., <sup>1</sup>Alex Lopez, <sup>1</sup>John Penn M.S., <sup>2</sup>An Zhao Ph.D., <sup>2</sup>Weiping Shao Ph.D., <sup>1,2</sup>Neil Stahl Ph.D., <sup>1,2</sup>Andrew J. Murphy Ph.D., <sup>2</sup>Sara Hamon Ph.D., <sup>2</sup>Aurelie Bouzelmat M.S., <sup>2</sup>Rick Zhang Ph.D., <sup>2</sup>Brad Shumel M.D., <sup>2</sup>Robert Pordy M.D., <sup>2</sup>Daniel Gipe M.D., <sup>2</sup>Gary A. Herman M.D., <sup>5</sup>Wayne H.H. Sheu M.D. Ph.D., <sup>6</sup>I-Te Lee M.D. Ph.D., <sup>7</sup>Kae-Woei Liang, <sup>8</sup>Xiuqing Guo Ph.D., <sup>8</sup>Jerome I. Rotter M.D., <sup>8</sup>Yii-Der I. Chen Ph.D., on behalf of the TAICHI consortium, <sup>9</sup>William E. Kraus M.D., <sup>9</sup>Svati H. Shah M.D. M.H.S., <sup>10</sup>Scott Damrauer M.D., <sup>11</sup>Aeron Small, <sup>11</sup>Daniel J. Rader M.D., <sup>12</sup>Anders Berg Wulff M.D. Ph.D., <sup>12,13,14,15,16</sup>Børge G. Nordestgaard M.D. D.M.Sc., <sup>12,13,15,16</sup>Anne Tybjerg-Hansen M.D. D.M.Sc., <sup>17</sup>Anita M. van den Hoek Ph.D., <sup>17</sup>Hans M.G. Princen Ph.D., <sup>4</sup>David H. Ledbetter, Ph.D., <sup>4</sup>David. J. Carey Ph.D., on behalf of the Geisinger-Regeneron DiscovEHR Collaboration, <sup>1</sup>John D. Overton Ph.D., <sup>1</sup>Jeffrey G. Reid Ph.D., <sup>2</sup>William J. Sasiela Ph.D., <sup>2</sup>Poulabi Banerjee Ph.D., <sup>1</sup>Alan R. Shuldiner M.D., <sup>1</sup>Ingrid B. Borecki Ph.D., <sup>1</sup>Tanya M. Teslovich Ph.D., <sup>1,2</sup>George D. Yancopoulos M.D., Ph.D., <sup>1,2</sup>Scott J. Mellis M.D., Ph.D., <sup>2</sup>Jesper Gromada Ph.D., D.M.Sc., <sup>1</sup>Aris Baras M.D.

**Affiliations:**

<sup>1</sup>Regeneron Genetics Center, Tarrytown, NY, USA

<sup>2</sup>Regeneron Pharmaceuticals, Tarrytown, NY, USA

<sup>33</sup>Department of Medicine, Division of Translational Medicine and Human Genetics, Perelman School of Medicine at the University of Pennsylvania, Philadelphia, PA, USA

<sup>4</sup>Geisinger Health System, Danville, PA, USA

<sup>5</sup>Division of Endocrinology and Metabolism, Department of Internal Medicine, Taichung Veterans General Hospital, Taichung, Taiwan; School of Medicine, National Yang-Ming University, Taipei, Taiwan; School of Medicine, National Defense Medical Center, Taipei, Taiwan; Institute of Medical Technology, National Chung-Hsing University, Taichung, Taiwan

<sup>6</sup>Division of Endocrinology and Metabolism, Department of Internal Medicine, Taichung Veterans General Hospital, Taichung, Taiwan; School of Medicine, Chung Shan Medical University, Taichung, Taiwan; School of Medicine, National Yang-Ming University, Taipei, Taiwan

<sup>7</sup>Cardiovascular Center, Taichung Veterans General Hospital, Taichung, Taiwan; School of Medicine, National Yang Ming University, Taipei, Taiwan; Department of Medicine, China Medical University, Taichung, Taiwan

<sup>8</sup> Institute for Translational Genomics and Population Sciences, Los Angeles Biomedical Research Institute and Department of Pediatrics, Harbor-UCLA Medical Center, Torrance, CA, USA

<sup>9</sup>Division of Cardiology, Department of Medicine; Molecular Physiology Institute, School of Medicine, Duke University, Durham, NC, USA

<sup>10</sup>Department of Surgery, Perelman School of Medicine, University of Pennsylvania, Philadelphia, PA, USA

<sup>11</sup>Department of Genetics, Perelman School of Medicine, University of Pennsylvania, Philadelphia, PA USA; Department of Medicine, Perelman School of Medicine, University of Pennsylvania, Philadelphia, PA, USA

<sup>12</sup>Department of Clinical Biochemistry, Rigshospitalet, Copenhagen University Hospital, Denmark

<sup>13</sup>The Copenhagen General Population Study, Herlev and Gentofte Hospital, Copenhagen University Hospital, Denmark

<sup>14</sup>Department of Clinical Biochemistry, Herlev and Gentofte Hospital, Copenhagen University Hospital, Denmark

<sup>15</sup>The Copenhagen City Heart Study, Frederiksberg Hospital, Copenhagen University Hospital, Denmark

<sup>16</sup>Faculty of Health and Medical Sciences, University of Copenhagen, Denmark

<sup>17</sup>TNO-Metabolic Health Research, Gaubius Laboratory, Leiden, The Netherlands

## ***Supplementary Methods***

### **Population Studies of *ANGPTL3* Loss-of-Function Variants and Coronary Artery Disease**

**DiscovEHR Study:** The DiscovEHR human genetics study is an ongoing study. The human genetics studies were conducted as part of the DiscovEHR study of the Regeneron Genetics Center and the Geisinger Health System. The Regeneron Genetics Center funded study sample collection, sequence data generation, and clinical and sequence data analysis. Participants were recruited from outpatient primary care and specialty clinics, the cardiac catheterization laboratory, and from patient populations referred for bariatric and abdominal vascular surgery between 2007 and 2016. Clinical laboratory measurements, International Classification of Diseases, Ninth Revision (ICD-9) disease diagnosis codes, medications, and procedural codes were extracted from the patient's electronic health records (EHR). Median values for serially measured total cholesterol, low-density lipoprotein cholesterol (LDL-C), HDL-C, and triglycerides were calculated for all individuals following removal of likely spurious values that were  $> 3$  standard deviations from the intra-individual median value for individuals with two or more measurements in the EHR. Total cholesterol and LDL-C were adjusted for lipid-altering medication use by dividing by 0.8 and 0.7, respectively, to estimate pre-treatment lipid values based on the average reduction in LDL-C and total cholesterol for the average statin dose.<sup>1</sup> HDL-C and triglyceride values were not adjusted for lipid-altering medication use. We calculated trait residuals for medication-adjusted LDL-C and total cholesterol, and  $\log_{10}$ (triglycerides) and  $\log_{10}$ (HDL-C) after adjustment for age, age<sup>2</sup>, sex, and the first five principal components of ancestry.

Phenotype definitions of coronary artery disease and myocardial infarction were developed to capture cases and controls with greater specificity compared to ICD-9 codes alone.<sup>2</sup> See **Table S1** for codes corresponding to diagnoses, procedures, and laboratory tests below.

- Coronary artery disease cases were defined as those patients meeting any of the criteria below:

- Discharge diagnosis code of Myocardial Infarction AND Myocardial Biomarkers above threshold for positivity (excluding results associated with encounter diagnoses for sepsis, GI bleed, hypertensive crisis, trauma or rhabdomyolysis)
- Angiographic evidence of CAD, as defined by angiographic stenosis of any severity with fractional flow reserve  $\leq 0.8$ , angiographic stenosis  $\geq 50\%$ , or functional evidence of inducible ischemia, as defined by stress induced or resting wall motion abnormality in a coronary distribution on stress echocardiography, or a fixed or reversible hypoperfusion in a coronary distribution on stress SPECT/PET
- History of Percutaneous Coronary Intervention or Coronary Artery Bypass Graft by procedure or diagnosis codes
- Coronary artery disease controls were defined as those patients who are not coronary artery diseases cases AND those meeting all the criteria below:
  - No diagnosis codes (inpatient or outpatient) of Myocardial Infarction, Unstable Angina, Angina, Acute Coronary Syndrome or Coronary Artery Disease
  - No history of Percutaneous Coronary Intervention or Coronary Artery Bypass Graft by procedure or diagnosis codes
  - No Myocardial Biomarkers<sup>2</sup> above threshold for positivity
- Myocardial infarction (MI) cases were defined as those patients meeting the criteria below:
  - $\geq 1$  Problem List OR  $\geq 2$  encounter diagnosis codes of Myocardial Infarction
- MI controls were defined as those patients who are not CAD Cases AND who are not MI Cases AND those meeting ALL the criteria below (same as Coronary Artery Disease Control definition):
  - No diagnosis codes (inpatient or outpatient) of Myocardial Infarction, Unstable Angina, Angina, Acute Coronary Syndrome or Coronary Artery Disease
  - No history of Percutaneous Coronary Intervention or Coronary Artery Bypass Graft by procedure or diagnosis codes
  - No Myocardial Biomarkers above threshold for positivity

**Copenhagen General Population Studies:** A total of 107,888 individuals from the Copenhagen City Heart Study, Copenhagen General Population Study and Copenhagen Ischemic Heart Disease Study were included in the analysis.<sup>3,4</sup> Participants were directly genotyped for the p.Ser17Ter, p.Asn121fs, p.Asn147fs, and c.495+6T>C variants with the use of the ABI PRISM 7900HT Sequence Detection System (Applied Biosystems) and TaqMan-based assays or with the use of an allele-specific PCR system (KASPer, LGC Genomics).

**Penn Medicine Biobank:**

Participants in the Penn Medicine Biobank were recruited from phlebotomy labs, preadmission testing, and cardiac catheterization labs at the University of Pennsylvania Health System and consented for biospecimen storage, access to electronic health record (EHR) data, and permission to recontact. A total of 7,549 participants of European ancestry were included in this analysis. Coronary artery disease case status was defined as in **Table S2**. *ANGPTL3* LoFs were extracted from exome sequence data generated at the Regeneron Genetics Center according to protocols as described below.

**Duke CATHGEN:** A total of 5,988 individuals from the Duke CATHeritization GENetics (CATHGEN) bio-repository were included in this analysis. CATHGEN includes clinical data and biological samples from individuals undergoing cardiac catheterization between 2001 and 2010.<sup>5</sup> Coronary artery disease case status was defined as in **Table S2**. *ANGPTL3* LoFs were extracted from exome sequence data generated at the Regeneron Genetics Center according to protocols as described below, with the following modification: samples were processed using the Kapa HyperPlus kit modified for the Regeneron Genetics Center's custom automation and captured with the xGen Exome Research Panel v1.0 from Integrated DNA Technologies (IDT).

**TAICHI:** A total of 9,058 samples from the TAIwan metaboCHIIP (TAICHI) consortium,<sup>6-8</sup> which aims to identify genetic determinants of atherosclerosis- and metabolic-related traits in Taiwanese Chinese, were included in this analysis. Academic centers participating include Taichung Veteran's General Hospital, Tri-Service General Hospital and the National Taiwan University Hospital, and the National Health Research Institute in Taiwan for subject ascertainment and phenotyping. Coronary artery disease case status was defined as in **Table**

**S2.** *ANGPTL3* LoFs were extracted from exome sequence data generated at the Regeneron Genetics Center according to protocols as described below.

A summary of all studies used for meta-analysis, including definitions for coronary artery disease, for the association between *ANGPTL3* loss-of-function variants and coronary artery disease is provided in **Table S2**.

### **Sequencing of *ANGPTL3* and Identification of Loss-of-Function Variants**

Sequence data for *ANGPTL3* were extracted from exome sequences generated at the Regeneron Genetics Center with the use of protocols as described.<sup>2,9</sup> In brief, sample quantity was determined by fluorescence (Life Technologies) and quality assessed by running 100ng of sample on a 2% pre-cast agarose gel (Life Technologies). The DNA samples were normalized and one aliquot was sent for genotyping (Illumina, Human OmniExpress Exome Beadchip) and another sheared to an average fragment length of 150 base pairs using focused acoustic energy (Covaris LE220). The sheared genomic DNA was prepared for exome capture with a custom reagent kit from Kapa Biosystems using a fully-automated approach developed at the Regeneron Genetics Center. A unique 6 base pair barcode was added to each DNA fragment during library preparation to facilitate multiplexed exome capture and sequencing. Equal amounts of sample were pooled prior to exome capture with NimbleGen probes (SeqCap VCRome). Captured fragments were bound to streptavidin-conjugated beads and non-specific DNA fragments removed by a series of stringent washes according to the manufacturer's recommended protocol (Roche NimbleGen). The captured DNA was PCR amplified and quantified by qRT-PCR (Kapa Biosystems). The multiplexed samples were sequenced using 75 bp paired-end sequencing on an Illumina v4 HiSeq 2500 to a coverage depth sufficient to provide greater than 20x haploid read depth of over 85% of targeted bases in 96% of samples (approximately 80x mean haploid read depth of targeted bases). Sequence reads were aligned to the human reference build GRCh37.p13, and single nucleotide variants (SNV) and insertion/deletion (indel) sequence variants were identified using the Genome Analysis Toolkit,<sup>10</sup> and annotated using SnpEff.<sup>11</sup> Variants in *ANGPTL3* were identified via positional intersection with Ensembl transcript ENST00000371129 (RefSeq mRNA sequence NM\_014495.3). Loss-of-function variants were defined as any of the following: SNVs leading to



a premature stop codon, loss of a start codon, or loss of a stop codon; SNVs or indels disrupting canonical splice acceptor or donor dinucleotides; open reading frame shifting indels leading to the formation of a premature stop codon. Visual inspection of read stacks and Sanger sequencing of LoF variant regions was used to confirm these genetic variants.

### **Analysis of Associations of *ANGPTL3* Loss-of-Function Variants with Lipid Levels and Coronary Artery Disease**

We used mixed linear models of association implemented in GCTA v1.2.4<sup>12</sup> to test for associations between lipid trait residuals defined as above and genotype (for aggregated *ANGPTL3* LoFs and the individual variants p.Ser17Ter, p.Asn121fs, p.Asn147fs, and c.495+6T>C) under an additive model (alleles coded 0,1 for non-carriers and heterozygotes, respectively; no homozygotes or compound heterozygotes were observed) in DiscovEHR. We included a genetic relatedness matrix (GRM), which captures population structure from ancestry and relatedness, as a random-effects covariate. The GRM was constructed from 39,858 non-MHC markers in approximate linkage equilibrium, with no greater than 1% genotype missingness, and with minor allele frequency > 0.1%. Odds ratios for coronary artery disease were estimated separately in each study using logistic regression adjusted for age, age<sup>2</sup>, and sex (CGPS) or Firth's penalized likelihood logistic regression,<sup>13</sup> implemented in the *logistf* package (v1.22) in R, adjusting for age, age<sup>2</sup>, sex, and the first five (DiscovEHR, Duke, Penn) or ten (TAICHI) principal components of ancestry. Study-level association results for *ANGPTL3* LoF variants and CAD were meta-analyzed using inverse variance weighted fixed effect meta-analysis using the *metagen* package (v.4.7.0) in R (v.3.3.1) and Mantel-Haenszel fixed-effects methods without continuity correction.

### **Quantification of *ANGPTL3* Protein Abundance**

Serum *ANGPTL3* levels were measured using a quantitative sandwich enzyme-linked immunosorbent assay (ELISA). The assay employed anti-human *ANGPTL3* monoclonal antibody as the capture reagent, recombinant human *ANGPTL3* as standard and anti-human *ANGPTL3* polyclonal antibody conjugated with biotin as the detection reagent. The lower limit of quantitation (LLOQ) of the assay for measuring *ANGPTL3* was 19.5 ng/mL in neat serum. The

assay accuracy ranged from 79.0% to 108.5% with intra- and inter-assay coefficients of variation (CV) less than 15%. To understand whether the LoFs were associated with reduced circulating levels of ANGPTL3 protein, we measured ANGPTL3 protein levels in available serum samples from 125 mutation carriers, which included carriers of each of the identified LoF variants, and 52 non-carriers matched for age, sex, and body mass index.

## **Antibodies**

Evinacumab (REGN1500),<sup>14</sup> was derived using Regeneron's Velocimmune® technology platform<sup>15</sup> and is a fully human monoclonal antibody with high affinity to ANGPTL3 from mouse, rat, monkey, and humans. Evinacumab has a human IgG4 constant region with a stabilizing mutation in the hinge region (serine to proline in position 108 in Genbank #P01864) to minimize half-antibody formation, which is known to occur for the natural IgG4 isotype.<sup>16</sup> An isotype-matched antibody with irrelevant specificity was used as control antibody.

## **Animal Studies**

APOE\*3Leiden.CETP mice, a well-established model for hyperlipidemia with all features of mixed or familial dysbetalipoproteinemia and atherosclerosis,<sup>17</sup> were used for the evaluation of the effects of evinacumab<sup>14,15,18</sup> on atherosclerosis. Fifty female transgenic mice,<sup>19</sup> 7-10 weeks of age at the start, received a semi-synthetic cholesterol-rich Western-type diet for run-in period of 4 weeks. The mice were housed 5/cage, in clean-conventional animal rooms (relative humidity 50-60%, temperature ~21°C, light cycle 7 am to 7 pm). At the end of run-in period mice were matched to one control group (n=20) and one evinacumab treated group (n=30) based on body weight, plasma total cholesterol, and triglycerides and treated with evinacumab or isotype-matched antibody with irrelevant specificity (control antibody) by weekly subcutaneous injections at a dose of 25 mg/kg for 13 weeks. Mice that developed a mouse anti-human antibody response were excluded, as described below. Blood samples were collected after a 4-hr fast every 2-4 weeks to measure plasma cholesterol and triglycerides. In addition, lipoprotein profiles were measured at weeks 0 and 13 in plasma samples, pooled per group. At 13 weeks mice were sacrificed and atherosclerosis development in the aortic root was measured (n=15/group) as described below. The study was conducted at TNO Metabolic Health

Research (Netherlands). All animal experiments were approved by the Institutional Animal Care and Use Committee of the Netherlands Organization for Applied Scientific Research.

Multiple administrations of human antibodies to mice often lead to development of mouse-anti-human antibodies and results in fast clearance of the human antibody from the circulation. Based on our previous knowledge, around 25-40% of mice develop such a response after evinacumab or the control antibody administration. Thus, additional animals were added to groups at the beginning of the atherosclerosis study (n=30 for evinacumab and n=20 for control antibody). This allowed us to exclude the animals that developed an anti-drug response and have n=15 per group available for the lesions analysis at the end of the study. Levels of circulating human antibodies (evinacumab and control antibody) were evaluated by human Fc ELISA at 8, 11, and 13 weeks of the study and the animals with the hFc concentrations below detection level were excluded from the study. Briefly, plates were coated with a goat anti-human Fc antibody (Sigma-Aldrich, MO) for capture. Mouse serum was then added to the plates and captured antibodies were detected by chemiluminescence using a horseradish peroxidase (HRP) conjugated goat anti-human IgG antibody (Sigma-Aldrich, MO). After that, the human-anti-mouse response was measured in samples collected at weeks 6 and 13 by a sandwich ELISA specific for the detection of anti-evinacumab or anti-control mouse IgG. Briefly, the plates were coated with 1 µg/mL of evinacumab or control Ab. Serial dilutions of serum samples were then added to the plates and the captured evinacumab or control antibody-specific mouse-anti-human antibodies were detected using horseradish peroxidase (HRP)-conjugated anti-mouse Fcγ (Sigma-Aldrich, MO). The chromogenic HRP-substrate 3,3',5,5'-tetramethylbenzidine (TMB) was used to detect HRP activity; and the resultant optical density of 450 nm (OD<sub>450</sub>) was read on a Victor X4 Multimode Plate Reader (Perkin Elmer, CT). Data of binding signal versus dilution factor were analyzed by non-linear regression using GraphPad Prism software and titers were calculated. Animals with very high titers (above 100,000) were excluded from the groups. An additional single mouse was excluded from the control group as an outlier after atherosclerotic lesion analysis. In total, 6 mice were excluded from the control group and 8 mice from evinacumab group based on the criteria described above. Although lipid levels were measured in 14 control and 22 evinacumab-treated mice (**Figure 3, A-D**), we

randomly excluded 7 additional mice from the evinacumab treatment group for atherosclerotic lesion analysis. This was done to reduce group size to n=15, as was planned at the initiation of the study (**Figure 3, E-H**).

### **Histological Assessment of Atherosclerosis in APOE\*3Leiden.CETP Mice Treated with Evinacumab or Control Antibody**

Hearts were isolated, fixed in formalin, and embedded in paraffin. They were then sectioned perpendicular to the axis of the aorta, starting within the heart and working in the direction of the aortic arch. Once the aortic root was identified by the appearance of aortic valve leaflets and smooth muscle cells instead of collagen-rich tissue, serial cross sections (5 µm thick with intervals of 50 µm) were taken and mounted on AAS-coated slides. These sections were stained with hematoxylinphloxine- saffron (HPS) for histological analysis. For each mouse, atherosclerosis was measured in 4 subsequent cross sections. Each section consisted of 3 segments. The average total lesion area per cross section was then calculated.<sup>20,21</sup> For determination of lesion severity the lesions were classified into five categories according to the American Heart Association classification<sup>22</sup>: 0) no lesion, I) early fatty streak, II) regular fatty streak, III) mild plaque, IV) moderate plaque, and V) severe plaque. The percentage of each lesion type was calculated, where type I-III lesions were classified as mild lesions and type IV-V lesions were classified as severe lesions.<sup>20,21</sup> In the aortic root, lesion composition was determined for the severe lesions (type IV-V) as a percentage of lesion area after immunostaining with anti-alpha smooth muscle actin (1:400; PROGEN Biotechnik GmbH, Heidelberg, Germany) which cross-reacts with mouse alpha actin for smooth muscle cells (SMC), and anti-mouse Mac-3 (1:50; BD Pharmingen, the Netherlands) for macrophages followed by sirius red staining for collagen. Necrotic area was measured after HPS staining.<sup>20,21,23</sup> In addition to results presented in the main text, no significant differences were found in the number of lesions, undiseased segments, or lesion severity, nor did evinacumab affect monocyte recruitment to the activated endothelium (data not shown).

## Evinacumab Clinical Trial Oversight and Participants

R1500-HV-1214 was a phase 1, first-in-human, randomized, ascending single-dose, placebo-controlled, double-blind study to assess the safety, tolerability, and pharmacodynamics of REGN1500 (evinacumab) administered subcutaneously (SC) or intravenously (IV) to the following 3 groups: Group A: subjects with elevations of fasting triglycerides (in mg/dL:  $150 \geq$  triglycerides  $\leq 450$ ) and/or direct measured LDL-C (LDL-C  $\geq 100$  mg/dL); Group B: subjects with elevations of fasting triglycerides  $\geq 450$  mg/dL; Group C: subjects with elevations of fasting triglycerides  $> 1000$  mg/dL on lipid lowering therapy. Only results from a pre-specified separate analysis of Group A are provided in this report; Groups B and C focused on subjects with severe hypertriglyceridemia. Demographics of Group A, which consisted of healthy males and females, ages 18 to 65 years, inclusive, with elevations of triglycerides (in mg/dL:  $150 \leq$  triglycerides  $\leq 450$ ) and LDL-C (LDL  $\geq 100$  mg/dL) are presented in **Tables S8-S9** and patient disposition is summarized in **Figure S1**. The study was designed to assess safety as the primary endpoint. The study enrolled participants from the following three sites: Comprehensive Clinical Development Inc (3400 Enterprise Way, Miramar, FL 33025); University of Pennsylvania Perelman School of Medicine (3400 Spruce Street, Philadelphia, PA 19104); Vince and Associates Clinical Research Inc. (10103 Metcalf Ave, Overland Park, KS 66212). Safety was assessed by means of evaluation of the incidence of adverse events, assessment of vital signs, physical examination, clinical laboratory testing, and electrocardiography. Pre-specified secondary endpoints included pharmacokinetic parameters, serum concentration of ANGPTL3, and anti-drug antibody titers. Exploratory endpoints included change from baseline in serum levels of several pharmacodynamics parameters including triglyceride, LDL-C (direct measure and calculated), HDL-C, and subfractions; VLDL-C; total cholesterol; Lp(a); and apolipoproteins A-1, B and C-III. An analysis of covariance (ANCOVA) model was used to compare the treatment effect of evinacumab and the pooled placebo group; in the case of TG rank-based ANCOVA was used. The model included dose levels as a factor and baseline levels as a covariate. Missing data were imputed with the last observation carried forward (LOCF) method. The least square (LS) mean differences between each evinacumab dose versus placebo, along with the 95% CI and p-values were calculated for HDL-C and LDL-C. The Hodges-Lehmann estimator of the median difference,

the 95% CI, and p-value were reported for TG. All tests were 2-sided tests with an alpha of 0.05 being considered statistically significant. All analyses were performed using SAS version 9.2.

## Supplementary Figures

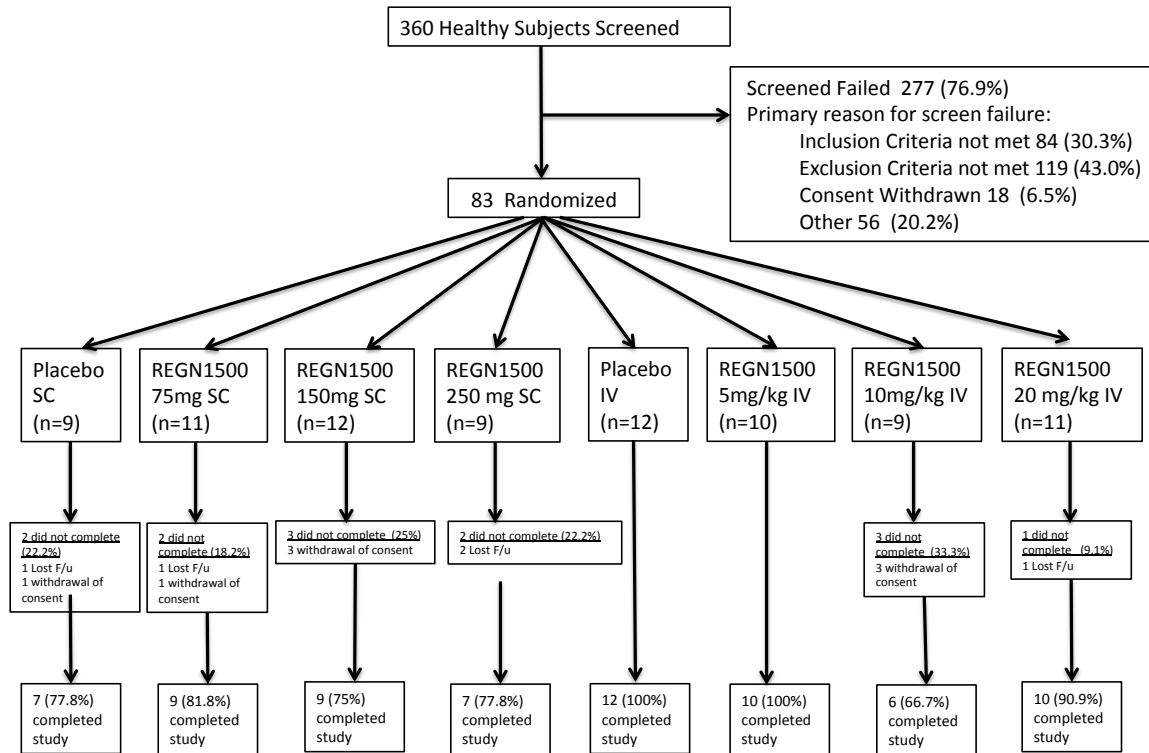

Figure S1. Patient disposition in R1500-HV-1214: Part A

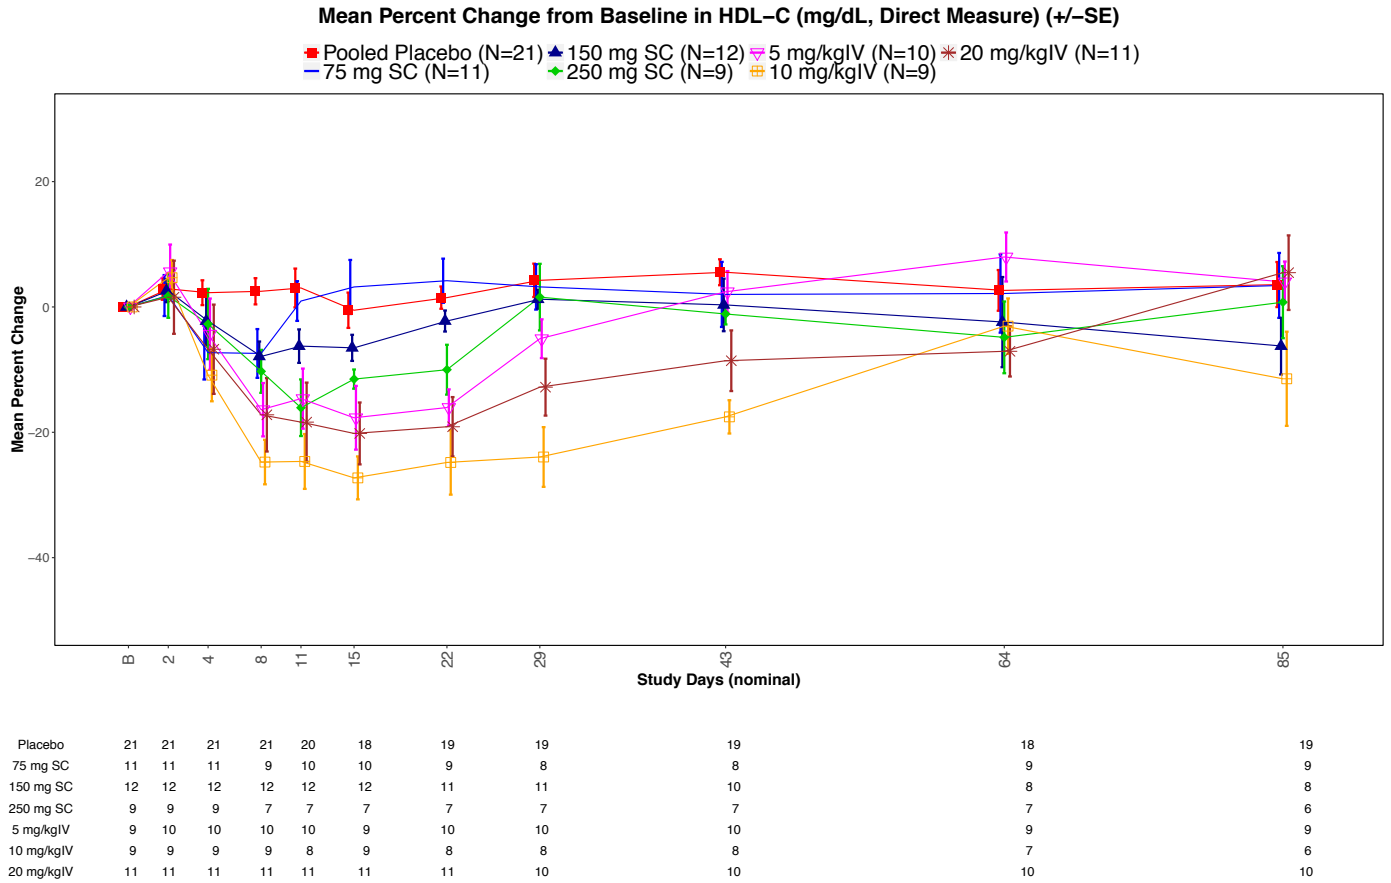

**Figure S2. Effects of Inhibition of ANGPTL3 with a Monoclonal Antibody in Human Volunteers on HDL-C.**

Mean percent change from baseline for HDL-C (mg/dL) for patients in the R1500-HV-1214 study.



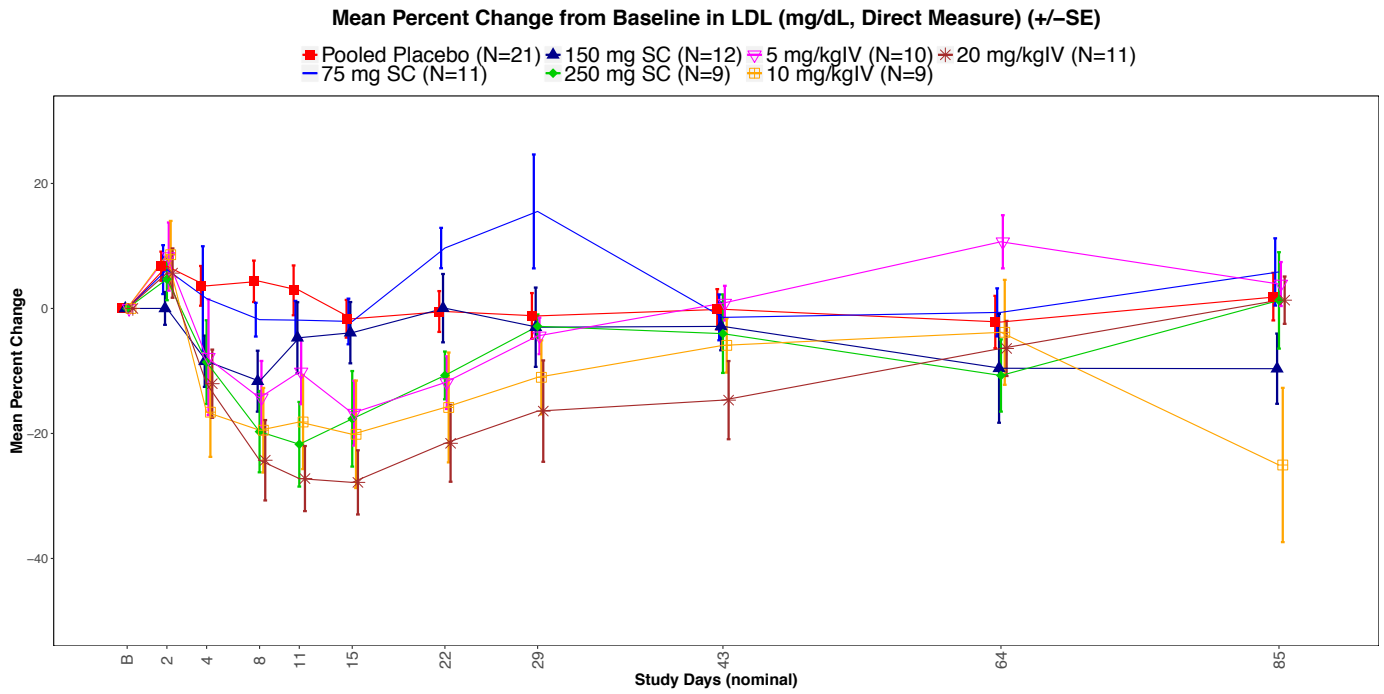

|            |    |    |    |    |    |    |    |    |    |    |    |
|------------|----|----|----|----|----|----|----|----|----|----|----|
| Placebo    | 21 | 21 | 21 | 21 | 20 | 18 | 19 | 19 | 19 | 18 | 19 |
| 75 mg SC   | 11 | 11 | 11 | 9  | 10 | 10 | 9  | 8  | 8  | 9  | 9  |
| 150 mg SC  | 12 | 12 | 12 | 12 | 12 | 12 | 11 | 11 | 10 | 8  | 8  |
| 250 mg SC  | 9  | 9  | 9  | 7  | 7  | 7  | 7  | 7  | 7  | 7  | 6  |
| 5 mg/kgIV  | 9  | 10 | 10 | 10 | 10 | 9  | 10 | 10 | 10 | 9  | 9  |
| 10 mg/kgIV | 9  | 9  | 9  | 9  | 8  | 9  | 8  | 8  | 8  | 7  | 6  |
| 20 mg/kgIV | 11 | 11 | 11 | 11 | 11 | 11 | 11 | 10 | 10 | 10 | 10 |

**Figure S3. Effects of Inhibition of ANGPTL3 with a Monoclonal Antibody in Human Volunteers on LDL-C.**

Mean percent change from baseline for LDL-C (mg/dL) for patients in the R1500-HV-1214 study.

## Supplementary Tables

**Table S1. Diagnosis, procedure, and laboratory code components of coronary artery disease case definition in DiscovEHR**

| Diagnosis, procedure, or laboratory test | Code   | Description                                                                      | Code system |
|------------------------------------------|--------|----------------------------------------------------------------------------------|-------------|
| MYOCARDIAL INFARCTION                    | 410.0  | Acute myocardial infarction, of anterolateral wall                               | ICD9CM      |
| MYOCARDIAL INFARCTION                    | 410.00 | Acute myocardial infarction of anterolateral wall, episode of care unspecified   | ICD9CM      |
| MYOCARDIAL INFARCTION                    | 410.01 | Acute myocardial infarction of anterolateral wall, initial episode of care       | ICD9CM      |
| MYOCARDIAL INFARCTION                    | 410.02 | Acute myocardial infarction of anterolateral wall, subsequent episode of care    | ICD9CM      |
| MYOCARDIAL INFARCTION                    | 410.1  | Acute myocardial infarction, of other anterior wall                              | ICD9CM      |
| MYOCARDIAL INFARCTION                    | 410.10 | Acute myocardial infarction of other anterior wall, episode of care unspecified  | ICD9CM      |
| MYOCARDIAL INFARCTION                    | 410.11 | Acute myocardial infarction of other anterior wall, initial episode of care      | ICD9CM      |
| MYOCARDIAL INFARCTION                    | 410.12 | Acute myocardial infarction of other anterior wall, subsequent episode of care   | ICD9CM      |
| MYOCARDIAL INFARCTION                    | 410.2  | Acute myocardial infarction, of inferolateral wall                               | ICD9CM      |
| MYOCARDIAL INFARCTION                    | 410.20 | Acute myocardial infarction of inferolateral wall, episode of care unspecified   | ICD9CM      |
| MYOCARDIAL INFARCTION                    | 410.21 | Acute myocardial infarction of inferolateral wall, initial episode of care       | ICD9CM      |
| MYOCARDIAL INFARCTION                    | 410.22 | Acute myocardial infarction of inferolateral wall, subsequent episode of care    | ICD9CM      |
| MYOCARDIAL INFARCTION                    | 410.3  | Acute myocardial infarction, of inferoposterior wall                             | ICD9CM      |
| MYOCARDIAL INFARCTION                    | 410.30 | Acute myocardial infarction of inferoposterior wall, episode of care unspecified | ICD9CM      |
| MYOCARDIAL INFARCTION                    | 410.31 | Acute myocardial infarction of inferoposterior wall, initial episode of care     | ICD9CM      |
| MYOCARDIAL INFARCTION                    | 410.32 | Acute myocardial infarction of inferoposterior wall, subsequent episode of care  | ICD9CM      |
| MYOCARDIAL INFARCTION                    | 410.4  | Acute myocardial infarction, of other inferior wall                              | ICD9CM      |
| MYOCARDIAL INFARCTION                    | 410.40 | Acute myocardial infarction of other inferior wall, episode of care unspecified  | ICD9CM      |
| MYOCARDIAL INFARCTION                    | 410.41 | Acute myocardial infarction of other inferior wall, initial episode of care      | ICD9CM      |
| MYOCARDIAL INFARCTION                    | 410.42 | Acute myocardial infarction of other inferior wall, subsequent episode of care   | ICD9CM      |
| MYOCARDIAL INFARCTION                    | 410.5  | Acute myocardial infarction, of other lateral wall                               | ICD9CM      |
| MYOCARDIAL INFARCTION                    | 410.50 | Acute myocardial infarction of other lateral wall, episode of care unspecified   | ICD9CM      |
| MYOCARDIAL INFARCTION                    | 410.51 | Acute myocardial infarction of other lateral wall, initial episode of care       | ICD9CM      |
| MYOCARDIAL INFARCTION                    | 410.52 | Acute myocardial infarction of other lateral wall, subsequent episode of care    | ICD9CM      |
| MYOCARDIAL INFARCTION                    | 410.6  | Acute myocardial infarction, true posterior wall infarction                      | ICD9CM      |
| MYOCARDIAL INFARCTION                    | 410.60 | True posterior wall infarction, episode of care unspecified                      | ICD9CM      |
| MYOCARDIAL INFARCTION                    | 410.61 | True posterior wall infarction, initial episode of care                          | ICD9CM      |

**Table S1. Diagnosis, procedure, and laboratory code components of coronary artery disease case definition in DiscovEHR**

|                                    |         |                                                                                   |        |
|------------------------------------|---------|-----------------------------------------------------------------------------------|--------|
| MYOCARDIAL INFARCTION              | 410.62  | True posterior wall infarction, subsequent episode of care                        | ICD9CM |
| MYOCARDIAL INFARCTION              | 410.7   | Acute myocardial infarction, subendocardial infarction                            | ICD9CM |
| MYOCARDIAL INFARCTION              | 410.70  | Subendocardial infarction, episode of care unspecified                            | ICD9CM |
| MYOCARDIAL INFARCTION              | 410.71  | Subendocardial infarction, initial episode of care                                | ICD9CM |
| MYOCARDIAL INFARCTION              | 410.72  | Subendocardial infarction, subsequent episode of care                             | ICD9CM |
| MYOCARDIAL INFARCTION              | 410.8   | Acute myocardial infarction, of other specified sites                             | ICD9CM |
| MYOCARDIAL INFARCTION              | 410.80  | Acute myocardial infarction of other specified sites, episode of care unspecified | ICD9CM |
| MYOCARDIAL INFARCTION              | 410.81  | Acute myocardial infarction of other specified sites, initial episode of care     | ICD9CM |
| MYOCARDIAL INFARCTION              | 410.82  | Acute myocardial infarction of other specified sites, subsequent episode of care  | ICD9CM |
| MYOCARDIAL INFARCTION              | 410.9   | Acute myocardial infarction, unspecified site                                     | ICD9CM |
| MYOCARDIAL INFARCTION              | 410.90  | Acute myocardial infarction of unspecified site, episode of care unspecified      | ICD9CM |
| MYOCARDIAL INFARCTION              | 410.91  | Acute myocardial infarction of unspecified site, initial episode of care          | ICD9CM |
| MYOCARDIAL INFARCTION              | 410.92  | Acute myocardial infarction of unspecified site, subsequent episode of care       | ICD9CM |
| MYOCARDIAL INFARCTION              | 411.0   | Postmyocardial infarction syndrome                                                | ICD9CM |
| MYOCARDIAL INFARCTION              | 411.89  | Other acute and subacute forms of ischemic heart disease, other                   | ICD9CM |
| MYOCARDIAL INFARCTION              | 412     | Old myocardial infarction                                                         | ICD9CM |
| MYOCARDIAL BIOMARKERS              | 10839-9 | Troponin I.cardiac [Mass/volume] in Serum or Plasma                               | LOINC  |
| MYOCARDIAL BIOMARKERS              | 42757-5 | Troponin I.cardiac [Mass/volume] in Blood                                         | LOINC  |
| MYOCARDIAL BIOMARKERS              | 6598-7  | Troponin T.cardiac [Mass/volume] in Serum or Plasma                               | LOINC  |
| MYOCARDIAL BIOMARKERS              | 12187-1 | Creatine kinase.MB/Creatine kinase.total in Serum or Plasma by Electrophoresis    | LOINC  |
| MYOCARDIAL BIOMARKERS              | 13969-1 | Creatine kinase.MB [Mass/volume] in Serum or Plasma                               | LOINC  |
| UNSTABLE ANGINA                    | 411.1   | Intermediate coronary syndrome                                                    | ICD9CM |
| PERCUTANEOUS CORONARY INTERVENTION | 00.66   | PTCA OR CORONARY ATHERECTOMY                                                      | ICD9CM |
| PERCUTANEOUS CORONARY INTERVENTION | 36.01   | RMVL COR ART OBSTR/STENT                                                          | ICD9CM |
| PERCUTANEOUS CORONARY INTERVENTION | 36.02   | REMOV COR ART OBSTR NOS                                                           | ICD9CM |
| PERCUTANEOUS CORONARY INTERVENTION | 36.03   | 1 PTCA/ATHERECT W/O TL                                                            | ICD9CM |
| PERCUTANEOUS CORONARY INTERVENTION | 36.04   | 1 PTCA/ATHERECT W TL                                                              | ICD9CM |
| PERCUTANEOUS CORONARY INTERVENTION | 36.05   | OPN CORONARY ANGIOPLASTY                                                          | ICD9CM |

**Table S1. Diagnosis, procedure, and laboratory code components of coronary artery disease case definition in DiscovEHR**

| INTERVENTION                       |        |                                                                                                                                                                                                                                                                                                                                                                     |        |
|------------------------------------|--------|---------------------------------------------------------------------------------------------------------------------------------------------------------------------------------------------------------------------------------------------------------------------------------------------------------------------------------------------------------------------|--------|
| PERCUTANEOUS CORONARY INTERVENTION | 36.06  | INTRACORONARY ARTERY TL                                                                                                                                                                                                                                                                                                                                             | ICD9CM |
| PERCUTANEOUS CORONARY INTERVENTION | 36.07  | PTCA/ATHERECT-MULT VESS                                                                                                                                                                                                                                                                                                                                             | ICD9CM |
| PERCUTANEOUS CORONARY INTERVENTION | 36.09  | NON-DRUG-ELUT COR STENT                                                                                                                                                                                                                                                                                                                                             | ICD9CM |
| PERCUTANEOUS CORONARY INTERVENTION | V45.82 | PCI                                                                                                                                                                                                                                                                                                                                                                 | ICD9CM |
| PERCUTANEOUS CORONARY INTERVENTION | 33572  | Coronary endarterectomy, open, any method, of left anterior descending, circumflex, or right coronary artery performed in conjunction with coronary artery bypass graft procedure, each vessel (List separately in addition to primary procedure)                                                                                                                   | CPT    |
| PERCUTANEOUS CORONARY INTERVENTION | 92920  | Percutaneous transluminal coronary angioplasty; single major coronary artery or branch                                                                                                                                                                                                                                                                              | CPT    |
| PERCUTANEOUS CORONARY INTERVENTION | 92921  | Percutaneous transluminal coronary angioplasty; each additional branch of a major coronary artery (List separately in addition to code for primary procedure)                                                                                                                                                                                                       | CPT    |
| PERCUTANEOUS CORONARY INTERVENTION | 92924  | Percutaneous transluminal coronary atherectomy, with coronary angioplasty when performed; single major coronary artery or branch                                                                                                                                                                                                                                    | CPT    |
| PERCUTANEOUS CORONARY INTERVENTION | 92925  | Percutaneous transluminal coronary atherectomy, with coronary angioplasty when performed; each additional branch of a major coronary artery (List separately in addition to code for primary procedure)                                                                                                                                                             | CPT    |
| PERCUTANEOUS CORONARY INTERVENTION | 92928  | Percutaneous transcatheter placement of intracoronary stent(s), with coronary angioplasty when performed; single major coronary artery or branch                                                                                                                                                                                                                    | CPT    |
| PERCUTANEOUS CORONARY INTERVENTION | 92929  | Percutaneous transcatheter placement of intracoronary stent(s), with coronary angioplasty when performed; each additional branch of a major coronary artery (List separately in addition to code for primary procedure)                                                                                                                                             | CPT    |
| PERCUTANEOUS CORONARY INTERVENTION | 92933  | Percutaneous transluminal coronary atherectomy, with intracoronary stent, with coronary angioplasty when performed; single major coronary artery or branch                                                                                                                                                                                                          | CPT    |
| PERCUTANEOUS CORONARY INTERVENTION | 92934  | Percutaneous transluminal coronary atherectomy, with intracoronary stent, with coronary angioplasty when performed; each additional branch of a major coronary artery (List separately in addition to code for primary procedure)                                                                                                                                   | CPT    |
| PERCUTANEOUS CORONARY INTERVENTION | 92937  | Percutaneous transluminal revascularization of or through coronary artery bypass graft (internal mammary, free arterial, venous), any combination of intracoronary stent, atherectomy and angioplasty, including distal protection when performed; single vessel                                                                                                    | CPT    |
| PERCUTANEOUS CORONARY INTERVENTION | 92938  | Percutaneous transluminal revascularization of or through coronary artery bypass graft (internal mammary, free arterial, venous), any combination of intracoronary stent, atherectomy and angioplasty, including distal protection when performed; each additional branch subtended by the bypass graft (List separately in addition to code for primary procedure) | CPT    |
| PERCUTANEOUS CORONARY INTERVENTION | 92941  | Percutaneous transluminal revascularization of acute total/subtotal occlusion during acute myocardial infarction, coronary artery or coronary artery bypass graft, any combination of intracoronary stent, atherectomy and angioplasty, including aspiration thrombectomy when performed, single vessel                                                             | CPT    |
| PERCUTANEOUS CORONARY INTERVENTION | 92943  | Percutaneous transluminal revascularization of chronic total occlusion, coronary artery, coronary artery branch, or coronary artery bypass graft, any combination of intracoronary stent, atherectomy and angioplasty; single vessel                                                                                                                                | CPT    |
| PERCUTANEOUS CORONARY INTERVENTION | 92944  | Percutaneous transluminal revascularization of chronic total occlusion, coronary artery, coronary artery branch, or coronary artery bypass graft, any combination of intracoronary stent, atherectomy and angioplasty; each additional coronary artery, coronary artery branch, or bypass graft (List                                                               | CPT    |

**Table S1. Diagnosis, procedure, and laboratory code components of coronary artery disease case definition in DiscovEHR**

|                                    |        |                                                                                                                                                                                                                                                                                   |        |
|------------------------------------|--------|-----------------------------------------------------------------------------------------------------------------------------------------------------------------------------------------------------------------------------------------------------------------------------------|--------|
|                                    |        | separately in addition to code for primary procedure)                                                                                                                                                                                                                             |        |
| PERCUTANEOUS CORONARY INTERVENTION | 92973  | Percutaneous transluminal coronary thrombectomy mechanical (List separately in addition to code for primary procedure)                                                                                                                                                            | CPT    |
| PERCUTANEOUS CORONARY INTERVENTION | 92974  | Transcatheter placement of radiation delivery device for subsequent coronary intravascular brachytherapy (List separately in addition to code for primary procedure)                                                                                                              | CPT    |
| CORONARY ARTERY BYPASS GRAFT       | 36.10  | AORTOCORONARY BYPASS NOS                                                                                                                                                                                                                                                          | ICD9CM |
| CORONARY ARTERY BYPASS GRAFT       | 36.11  | AO-COR BYPASS-1 COR ART                                                                                                                                                                                                                                                           | ICD9CM |
| CORONARY ARTERY BYPASS GRAFT       | 36.12  | AO-COR BYPASS-2 COR ART                                                                                                                                                                                                                                                           | ICD9CM |
| CORONARY ARTERY BYPASS GRAFT       | 36.13  | AO-COR BYPASS-3 COR ART                                                                                                                                                                                                                                                           | ICD9CM |
| CORONARY ARTERY BYPASS GRAFT       | 36.14  | AO-COR BYPASS-4+ COR ART                                                                                                                                                                                                                                                          | ICD9CM |
| CORONARY ARTERY BYPASS GRAFT       | 36.15  | 1 INT MAM-COR ART BYPASS                                                                                                                                                                                                                                                          | ICD9CM |
| CORONARY ARTERY BYPASS GRAFT       | 36.16  | 2 INT MAM-COR ART BYPASS                                                                                                                                                                                                                                                          | ICD9CM |
| CORONARY ARTERY BYPASS GRAFT       | 36.19  | HRT REVASC BYP ANAST NEC                                                                                                                                                                                                                                                          | ICD9CM |
| CORONARY ARTERY BYPASS GRAFT       | V45.81 | CABG                                                                                                                                                                                                                                                                              | ICD9CM |
| CORONARY ARTERY BYPASS GRAFT       | 0205T  | Intravascular catheter-based coronary vessel or graft spectroscopy (eg, infrared) during diagnostic evaluation and/or therapeutic intervention including imaging supervision, interpretation, and report, each vessel (List separately in addition to code for primary procedure) | CPT    |
| CORONARY ARTERY BYPASS GRAFT       | 33503  | Repair of anomalous coronary artery from pulmonary artery origin; by graft, without cardiopulmonary bypass                                                                                                                                                                        | CPT    |
| CORONARY ARTERY BYPASS GRAFT       | 33504  | Repair of anomalous coronary artery from pulmonary artery origin; by graft, with cardiopulmonary bypass                                                                                                                                                                           | CPT    |
| CORONARY ARTERY BYPASS GRAFT       | 33510  | Coronary artery bypass, vein only; single coronary venous graft                                                                                                                                                                                                                   | CPT    |
| CORONARY ARTERY BYPASS GRAFT       | 33511  | Coronary artery bypass, vein only; 2 coronary venous grafts                                                                                                                                                                                                                       | CPT    |
| CORONARY ARTERY BYPASS GRAFT       | 33512  | Coronary artery bypass, vein only; 3 coronary venous grafts                                                                                                                                                                                                                       | CPT    |
| CORONARY ARTERY BYPASS GRAFT       | 33513  | Coronary artery bypass, vein only; 4 coronary venous grafts                                                                                                                                                                                                                       | CPT    |
| CORONARY ARTERY BYPASS GRAFT       | 33514  | Coronary artery bypass, vein only; 5 coronary venous grafts                                                                                                                                                                                                                       | CPT    |
| CORONARY ARTERY BYPASS GRAFT       | 33516  | Coronary artery bypass, vein only; 6 or more coronary venous grafts                                                                                                                                                                                                               | CPT    |

**Table S1. Diagnosis, procedure, and laboratory code components of coronary artery disease case definition in DiscovEHR**

| GRAFT                        |       |                                                                                                                                                                                                                                                                                                                                                                     |     |
|------------------------------|-------|---------------------------------------------------------------------------------------------------------------------------------------------------------------------------------------------------------------------------------------------------------------------------------------------------------------------------------------------------------------------|-----|
| CORONARY ARTERY BYPASS GRAFT | 33517 | Coronary artery bypass, using venous graft(s) and arterial graft(s); single vein graft (List separately in addition to code for primary procedure)                                                                                                                                                                                                                  | CPT |
| CORONARY ARTERY BYPASS GRAFT | 33518 | Coronary artery bypass, using venous graft(s) and arterial graft(s); 2 venous grafts (List separately in addition to code for primary procedure)                                                                                                                                                                                                                    | CPT |
| CORONARY ARTERY BYPASS GRAFT | 33519 | Coronary artery bypass, using venous graft(s) and arterial graft(s); 3 venous grafts (List separately in addition to code for primary procedure)                                                                                                                                                                                                                    | CPT |
| CORONARY ARTERY BYPASS GRAFT | 33521 | Coronary artery bypass, using venous graft(s) and arterial graft(s); 4 venous grafts (List separately in addition to code for primary procedure)                                                                                                                                                                                                                    | CPT |
| CORONARY ARTERY BYPASS GRAFT | 33522 | Coronary artery bypass, using venous graft(s) and arterial graft(s); 5 venous grafts (List separately in addition to code for primary procedure)                                                                                                                                                                                                                    | CPT |
| CORONARY ARTERY BYPASS GRAFT | 33523 | Coronary artery bypass, using venous graft(s) and arterial graft(s); 6 or more venous grafts (List separately in addition to code for primary procedure)                                                                                                                                                                                                            | CPT |
| CORONARY ARTERY BYPASS GRAFT | 33530 | Reoperation, coronary artery bypass procedure or valve procedure, more than 1 month after original operation (List separately in addition to code for primary procedure)                                                                                                                                                                                            | CPT |
| CORONARY ARTERY BYPASS GRAFT | 33533 | Coronary artery bypass, using arterial graft(s); single arterial graft                                                                                                                                                                                                                                                                                              | CPT |
| CORONARY ARTERY BYPASS GRAFT | 33534 | Coronary artery bypass, using arterial graft(s); 2 coronary arterial grafts                                                                                                                                                                                                                                                                                         | CPT |
| CORONARY ARTERY BYPASS GRAFT | 33535 | Coronary artery bypass, using arterial graft(s); 3 coronary arterial grafts                                                                                                                                                                                                                                                                                         | CPT |
| CORONARY ARTERY BYPASS GRAFT | 33536 | Coronary artery bypass, using arterial graft(s); 4 or more coronary arterial grafts                                                                                                                                                                                                                                                                                 | CPT |
| CORONARY ARTERY BYPASS GRAFT | 33548 | Surgical ventricular restoration procedure, includes prosthetic patch, when performed (eg, ventricular remodeling, SVR, SAVER, Dor procedures)                                                                                                                                                                                                                      | CPT |
| CORONARY ARTERY BYPASS GRAFT | 35500 | Harvest of upper extremity vein, 1 segment, for lower extremity or coronary artery bypass procedure (List separately in addition to code for primary procedure)                                                                                                                                                                                                     | CPT |
| CORONARY ARTERY BYPASS GRAFT | 35600 | Harvest of upper extremity artery, 1 segment, for coronary artery bypass procedure (List separately in addition to code for primary procedure)                                                                                                                                                                                                                      | CPT |
| CORONARY ARTERY BYPASS GRAFT | 4110F | Internal mammary artery graft performed for primary, isolated coronary artery bypass graft procedure (CABG)                                                                                                                                                                                                                                                         | CPT |
| CORONARY ARTERY BYPASS GRAFT | 4115F | Beta blocker administered within 24 hours prior to surgical incision (CABG)                                                                                                                                                                                                                                                                                         | CPT |
| CORONARY ARTERY BYPASS GRAFT | 92937 | Percutaneous transluminal revascularization of or through coronary artery bypass graft (internal mammary, free arterial, venous), any combination of intracoronary stent, atherectomy and angioplasty, including distal protection when performed; single vessel                                                                                                    | CPT |
| CORONARY ARTERY BYPASS GRAFT | 92938 | Percutaneous transluminal revascularization of or through coronary artery bypass graft (internal mammary, free arterial, venous), any combination of intracoronary stent, atherectomy and angioplasty, including distal protection when performed; each additional branch subtended by the bypass graft (List separately in addition to code for primary procedure) | CPT |
| CORONARY ARTERY BYPASS GRAFT | 92943 | Percutaneous transluminal revascularization of chronic total occlusion, coronary artery, coronary artery branch, or coronary artery bypass graft, any combination of intracoronary stent, atherectomy and angioplasty; single vessel                                                                                                                                | CPT |

**Table S1. Diagnosis, procedure, and laboratory code components of coronary artery disease case definition in DiscovEHR**

|                              |        |                                                                                                                                                                                                                                                                                                                                                             |        |
|------------------------------|--------|-------------------------------------------------------------------------------------------------------------------------------------------------------------------------------------------------------------------------------------------------------------------------------------------------------------------------------------------------------------|--------|
| CORONARY ARTERY BYPASS GRAFT | 92944  | Percutaneous transluminal revascularization of chronic total occlusion, coronary artery, coronary artery branch, or coronary artery bypass graft, any combination of intracoronary stent, atherectomy and angioplasty; each additional coronary artery, coronary artery branch, or bypass graft (List separately in addition to code for primary procedure) | CPT    |
| ANGINA                       | 413    | Angina pectoris                                                                                                                                                                                                                                                                                                                                             | ICD9CM |
| ANGINA                       | 413.0  | Angina decubitus                                                                                                                                                                                                                                                                                                                                            | ICD9CM |
| ANGINA                       | 413.1  | Prinzmetal angina                                                                                                                                                                                                                                                                                                                                           | ICD9CM |
| ANGINA                       | 413.9  | Other and unspecified angina pectoris                                                                                                                                                                                                                                                                                                                       | ICD9CM |
| ACUTE CORONARY SYNDROME      | 411.1  | Intermediate coronary syndrome                                                                                                                                                                                                                                                                                                                              | ICD9CM |
| ACUTE CORONARY SYNDROME      | 411.81 | Acute coronary occlusion without myocardial infarction                                                                                                                                                                                                                                                                                                      | ICD9CM |
| ACUTE CORONARY SYNDROME      | 411.89 | Other acute and subacute forms of ischemic heart disease, other                                                                                                                                                                                                                                                                                             | ICD9CM |
| CORONARY ARTERY DISEASE      | 414.0  | Coronary atherosclerosis                                                                                                                                                                                                                                                                                                                                    | ICD9CM |
| CORONARY ARTERY DISEASE      | 414.00 | Coronary atherosclerosis of unspecified type of vessel, native or graft                                                                                                                                                                                                                                                                                     | ICD9CM |
| CORONARY ARTERY DISEASE      | 414.01 | Coronary atherosclerosis of native coronary artery                                                                                                                                                                                                                                                                                                          | ICD9CM |
| CORONARY ARTERY DISEASE      | 414.02 | Coronary atherosclerosis of autologous vein bypass graft                                                                                                                                                                                                                                                                                                    | ICD9CM |
| CORONARY ARTERY DISEASE      | 414.03 | Coronary atherosclerosis of nonautologous biological bypass graft                                                                                                                                                                                                                                                                                           | ICD9CM |
| CORONARY ARTERY DISEASE      | 414.04 | Coronary atherosclerosis of artery bypass graft                                                                                                                                                                                                                                                                                                             | ICD9CM |
| CORONARY ARTERY DISEASE      | 414.05 | Coronary atherosclerosis of unspecified bypass graft                                                                                                                                                                                                                                                                                                        | ICD9CM |
| CORONARY ARTERY DISEASE      | 414.06 | Coronary atherosclerosis of native coronary artery of transplanted heart                                                                                                                                                                                                                                                                                    | ICD9CM |
| CORONARY ARTERY DISEASE      | 414.07 | Coronary atherosclerosis of bypass graft (artery) (vein) of transplanted heart                                                                                                                                                                                                                                                                              | ICD9CM |
| CORONARY ARTERY DISEASE      | 414.1  | Aneurysm and dissection of heart                                                                                                                                                                                                                                                                                                                            | ICD9CM |
| CORONARY ARTERY DISEASE      | 414.10 | Aneurysm of heart (wall)                                                                                                                                                                                                                                                                                                                                    | ICD9CM |
| CORONARY ARTERY DISEASE      | 414.11 | Aneurysm of coronary vessels                                                                                                                                                                                                                                                                                                                                | ICD9CM |
| CORONARY ARTERY DISEASE      | 414.12 | Dissection of coronary artery                                                                                                                                                                                                                                                                                                                               | ICD9CM |
| CORONARY ARTERY DISEASE      | 414.19 | Other aneurysm of heart                                                                                                                                                                                                                                                                                                                                     | ICD9CM |
| CORONARY ARTERY DISEASE      | 414.2  | Chronic total occlusion of coronary artery                                                                                                                                                                                                                                                                                                                  | ICD9CM |
| CORONARY ARTERY DISEASE      | 414.3  | Coronary atherosclerosis due to lipid rich plaque                                                                                                                                                                                                                                                                                                           | ICD9CM |
| CORONARY ARTERY DISEASE      | 414.8  | Other specified forms of chronic ischemic heart disease                                                                                                                                                                                                                                                                                                     | ICD9CM |
| CORONARY ARTERY DISEASE      | 414.9  | Chronic ischemic heart disease, unspecified                                                                                                                                                                                                                                                                                                                 | ICD9CM |

**Table S2. Study Populations For Association Between Loss of Function Variants in *ANGPTL3* And Coronary Artery Disease**

| <b>Study</b>           | <b>CAD case definition</b>                                                                                                                                                                                                                                                                                                                                   | <b>Ancestry</b>      | <b>CAD Cases</b> | <b>CAD-free Controls</b> | <b><i>ANGPTL3</i> LoF ascertainment</b> |
|------------------------|--------------------------------------------------------------------------------------------------------------------------------------------------------------------------------------------------------------------------------------------------------------------------------------------------------------------------------------------------------------|----------------------|------------------|--------------------------|-----------------------------------------|
| <b>DiscovEHR</b>       | History of coronary revascularization in the electronic health record or angiographic evidence of obstructive coronary atherosclerosis (>50% stenosis in at least one major epicardial vessel from catheterization report) or history of acute coronary syndrome (ICD-9 codes 410,* 412*) with accompanying biochemical or electrocardiographic evidence.    | European             | 13,102           | 40,430                   | Whole exome sequencing                  |
| <b>CGPS/CCHS/CIHDS</b> | Patients from the Copenhagen Ischemic Heart Disease Study with verified coronary artery disease and participants from the CCHS and CGPS with myocardial infarction.                                                                                                                                                                                          | European             | 11,172           | 96,716                   | Targeted genotyping                     |
| <b>Penn</b>            | Angiographically-confirmed coronary artery disease (stenosis > 50% in any epicardial vessel), history of revascularization, or one or more diagnosis codes corresponding to acute or old myocardial infarction (ICD-9 410* or, 412*), or two or more diagnosis codes on separate calendar days corresponding to chronic ischemic heart disease (ICD-9 414*). | European             | 3,991            | 3,558                    | Whole exome sequencing                  |
| <b>Duke</b>            | Angiographically-confirmed coronary artery disease (stenosis > 50% in any epicardial vessel), or history of revascularization or myocardial infarction.                                                                                                                                                                                                      | European             | 4,519            | 1,469                    | Whole exome sequencing                  |
| <b>TAICHI</b>          | Angiographically-confirmed coronary artery disease (stenosis > 50% in any epicardial vessel), or history of revascularization or myocardial infarction.                                                                                                                                                                                                      | Taiwanese<br>Chinese | 3,635            | 5,423                    | Whole exome sequencing                  |

Abbreviations: CAF, cumulative allele frequency; CCHS, Copenhagen City Heart Study; CGPS, Copenhagen General Population Study; CIHDS, Copenhagen Ischemic Heart Disease Study; CI, confidence interval; LoF, loss-of-function variant.



**Table S3. Loss of Function Variants in *ANGPTL3***

| Chromosome   | Position | Reference allele | Alternate allele | Mutation    | Variant Type     | Carriers   |
|--------------|----------|------------------|------------------|-------------|------------------|------------|
| 1            | 63063287 | CC               | GA               | p.Ser17Ter  | Nonsense         | 21         |
| 1            | 63063526 | A                | T                | p.Lys97Ter  | Nonsense         | 2          |
| 1            | 63063556 | C                | T                | p.Gln107Ter | Nonsense         | 1          |
| 1            | 63063592 | GAACTC           | G                | p.Asn121fs  | Frameshift indel | 91         |
| 1            | 63063667 | CAACT            | C                | p.Asn147fs  | Frameshift indel | 52         |
| 1            | 63063738 | T                | C                | c.495+6T>C  | Splice region    | 57         |
| 1            | 63064442 | CA               | C                | p.Gln191fs  | Frameshift indel | 1          |
| 1            | 63066839 | GA               | G                | p.Asn232fs  | Frameshift indel | 7          |
| 1            | 63066869 | T                | C                | c.721+2T>C  | Splice donor     | 1          |
| 1            | 63068052 | G                | GT               | c.931+2dupT | Splice donor     | 3          |
| 1            | 63069895 | AG               | A                | p.Gly397fs  | Frameshift indel | 3          |
| 1            | 63070316 | G                | A                | p.Trp404Ter | Nonsense         | 6          |
| 1            | 63070433 | C                | CT               | p.Ile444fs  | Frameshift indel | 1          |
| <b>Total</b> |          |                  |                  |             |                  | <b>246</b> |

---

**Table S4. Clinical Characteristics of DiscovEHR Participants According to *ANGPTL3* Loss-of-Function Variant Status**

---

|                                     | <i>ANGPTL3</i> loss of function variant carriers<br>(n=246) | Sequenced non-carriers<br>(n = 58,089) |
|-------------------------------------|-------------------------------------------------------------|----------------------------------------|
| Age, yr, median (IQR)*              | 63 (49-73)                                                  | 61 (48-72)                             |
| Female sex, n (%)                   | 141 (57%)                                                   | 34,548 (59%)                           |
| BMI, kg/m2, median (IQR)            | 30 (26-34)                                                  | 30 (26-36)                             |
| Current smoker, n (%)               | 28 (11%)                                                    | 10,092 (17%)                           |
| <b>Medications</b>                  |                                                             |                                        |
| Lipid lowering medication, n (%)    | 72 (29%)                                                    | 22,111 (38%)                           |
| Anti-hypertensive medication, n (%) | 140 (57%)                                                   | 34,976 (60%)                           |
| Hypoglycemic medication, n (%)      | 39 (16%)                                                    | 9,651 (17%)                            |
| <b>Medical history</b>              |                                                             |                                        |
| Hypertension, n (%)                 | 133 (54%)                                                   | 34,318 (59%)                           |
| Diabetes mellitus type 2, n (%)     | 56 (23%)                                                    | 12,829 (22%)                           |

---

\*At last encounter

Abbreviations: BMI, body mass index; IQR, interquartile range; kg, kilograms; yr, year.

---

---

**Table S5. Associations Between Loss of Function Variants in *ANGPTL3* And Fasting Lipid Levels in DiscovEHR**

| Trait                                    | N      | $\beta$ | SE   | P value  |
|------------------------------------------|--------|---------|------|----------|
| Total cholesterol, mg/dl                 | 45,068 | -24.42  | 2.87 | 1.74E-17 |
| HDL-C, log <sub>10</sub> (mg/dl)         | 45,226 | -0.02   | 0.01 | 1.74E-02 |
| LDL-C, mg/dl                             | 44,819 | -11.16  | 2.66 | 2.82E-05 |
| Triglycerides, log <sub>10</sub> (mg/dl) | 45,206 | -0.14   | 0.01 | 2.52E-21 |

Abbreviations: HDL-C, high density lipoprotein cholesterol; LDL-C, low density lipoprotein cholesterol; SE, standard error.

Actual values are displayed in **Figure 1**.

LDL-C and total cholesterol were adjusted for lipid-lowering medication use by dividing by 0.7 and 0.8, respectively.

\*According to mixed linear model association analysis of lipid residuals after adjustment for age, age<sup>2</sup>, sex, and the first five principal components of ancestry.

A genetic relatedness matrix was included as a random effects covariate. Triglycerides and HDL-C were log<sub>10</sub> transformed prior to analysis.

---

**Table S6. Associations Between Individual Loss of Function Variants in *ANGPTL3* And Fasting Lipid Levels in DiscovEHR**

| Variant                            | Total cholesterol, mg/dl |      |          | HDL-C, log <sub>10</sub> (mg/dl) |      |          | LDL-C, mg/dl |      |          | TGs, log <sub>10</sub> (mg/dl) |      |          |
|------------------------------------|--------------------------|------|----------|----------------------------------|------|----------|--------------|------|----------|--------------------------------|------|----------|
|                                    | β                        | SE   | P value  | β                                | SE   | P value  | β            | SE   | P value  | β                              | SE   | P value  |
| p.S17X<br>(n=21 heterozygotes)     | -31.74                   | 9.57 | 9.09E-04 | -0.05                            | 0.03 | 4.01E-02 | -14.19       | 8.87 | 1.10E-01 | -0.13                          | 0.05 | 6.01E-03 |
| p.N121fs<br>(n=91 heterozygotes)   | -25.05                   | 4.77 | 1.48E-07 | 0.00                             | 0.01 | 9.87E-01 | -12.46       | 4.42 | 4.79E-03 | -0.17                          | 0.02 | 6.70E-12 |
| p.N147fs<br>(n=52 heterozygotes)   | -33.06                   | 6.06 | 4.99E-08 | -0.02                            | 0.02 | 3.37E-01 | -18.65       | 5.62 | 9.00E-04 | -0.16                          | 0.03 | 2.17E-07 |
| c.495+6T>C<br>(n=57 heterozygotes) | -12.32                   | 5.97 | 3.92E-02 | -0.02                            | 0.02 | 1.46E-01 | -0.82        | 5.53 | 8.82E-01 | -0.11                          | 0.03 | 1.61E-04 |

Abbreviations: HDL-C, high density lipoprotein cholesterol; LDL-C, low density lipoprotein cholesterol; SE, standard error; SE, standard error; TGs, triglycerides. LDL-C and total cholesterol were adjusted for lipid-lowering medication use by dividing by 0.7 and 0.8, respectively.

\*According to mixed linear model association analysis of lipid residuals after adjustment for age, age<sup>2</sup>, sex, and the first five principal components of ancestry. A genetic relatedness matrix was included as a random effects covariate. Triglycerides and HDL-C were log<sub>10</sub> transformed prior to analysis.

**Table S7. Associations Between Individual Loss of Function Variants in *ANGPTL3* And Coronary Artery Disease in DiscovEHR**

| Variant    | Case heterozygotes | Control heterozygotes | Carrier frequency-cases (%) | Carrier frequency-controls (%) | Odds ratio (95% CI)* | P value* |
|------------|--------------------|-----------------------|-----------------------------|--------------------------------|----------------------|----------|
| p.S17X     | 3/13,102           | 15/40,430             | 0.02                        | 0.04                           | 0.44 (0.11-1.36)     | 1.59E-01 |
| p.N121fs   | 16/13,102          | 71/40,430             | 0.12                        | 0.18                           | 0.56 (0.30-0.99)     | 4.76E-02 |
| p.N147fs   | 9/13,102           | 39/40,430             | 0.07                        | 0.10                           | 0.57 (0.25-1.22)     | 1.54E-01 |
| c.495+6T>C | 10/13,102          | 40/40,430             | 0.08                        | 0.10                           | 0.69 (0.31-1.44)     | 3.34E-01 |

Abbreviations: CAF, cumulative allele frequency; CI, confidence interval; pLOF, predicted loss-of-function variant.

Odds ratios are from Firth's penalized likelihood logistic regression adjusted for age, age<sup>2</sup>, sex, and the first five principal components of ancestry.

**Table S8. Baseline Demographics and Clinical Characteristics of Healthy Volunteers Treated with SQ Evinacumab**

|                                               | Placebo (n=9)    | Evinacumab<br>75 mg (n=11) | Evinacumab<br>150 mg (n=12) | Evinacumab<br>250 mg (n=9) |
|-----------------------------------------------|------------------|----------------------------|-----------------------------|----------------------------|
| Age, mean (SD), yr                            | 46.9 (8.87)      | 45.7 (12.63)               | 43.8 (10.22)                | 48.6 (8.97)                |
| <b>Ethnicity</b>                              |                  |                            |                             |                            |
| Hispanic or Latino, n (%)                     | 9 (100%)         | 9 (81.8%)                  | 12 (100%)                   | 8 (88.9%)                  |
| Not Hispanic or Latino, n (%)                 | 0                | 2 (18.2%)                  | 0                           | 1 (11.1%)                  |
| <b>Race</b>                                   |                  |                            |                             |                            |
| Black or African American, n (%)              | 0                | 0                          | 0                           | 1 (11.1%)                  |
| White, n (%)                                  | 9 (100%)         | 11 (100%)                  | 12 (100%)                   | 8 (88.9%)                  |
| Female, n (%)                                 | 2 (22.2%)        | 6 (54.5%)                  | 3 (25.0%)                   | 5 (55.6%)                  |
| Height, mean (SD), cm                         | 171.22 (5.041)   | 163.78 (10.251)            | 171.59 (7.036)              | 166.28 (10.007)            |
| Body mass, mean (SD), kg                      | 81.08 (11.486)   | 76.35 (9.187)              | 85.08 (15.625)              | 78.51 (16.467)             |
| Body mass index, mean (SD), kg/m <sup>2</sup> | 27.71 (4.141)    | 28.49 (2.756)              | 28.74 (4.047)               | 28.12 (3.049)              |
| <b>Fasting lipids</b>                         |                  |                            |                             |                            |
| LDL-C, direct measured, mean (SD), mg/dl      | 143.67 (24.255)  | 139.33 (37.169)            | 136.38 (31.933)             | 149.78 (28.348)            |
| LDL-C, calculated, mean (SD), mg/dl           | 131.61 (24.301)  | 129.66 (31.596)            | 123.22 (30.833)             | 137.03 (30.699)            |
| Triglycerides, median (Q1-Q3) mg/dl           | 183.5 (126-217)  | 161.5 (126-227)            | 171.75 (119.25-202.75)      | 208.5 (149.5-268)          |
| HDL-C, mean (SD), mg/dl                       | 48.00 (8.452)    | 49.30 (12.805)             | 47.36 (15.692)              | 54.50 (23.448)             |
| Non-HDL cholesterol, mean (SD), mg/dl         | 168.83 (21.588)  | 164.12 (28.377)            | 159.13 (35.595)             | 175.94 (45.120)            |
| Total cholesterol, mean (SD), mg/dl           | 216.83 (25.137)  | 213.42 (32.270)            | 206.49 (39.298)             | 230.44 (31.196)            |
| VLDL-cholesterol, median (Q1-Q3) mg/dl        | 37 (26-50)       | 30 (25.5-39)               | 38.5 (23.25-44.5)           | 37.5 (29.5-39)             |
| ApoA1, mean (SD), mg/dl                       | 143.11 (18.889)  | 145.85 (22.462)            | 136.82 (24.018)             | 150.00 (26.424)            |
| ApoB, mean (SD), mg/dl                        | 121.39 (16.744)  | 119.00 (21.404)            | 115.50 (28.960)             | 125.39 (28.776)            |
| ApoB/ApoA1 Ratio                              | 0.86 (0.151)     | 0.83 (0.189)               | 0.86 (0.220)                | 0.87 (0.271)               |
| Hs-CRP, median (Q1-Q3) mg/L                   | 1.59 (1.34-3.24) | 1.81 (0.7-3.59)            | 1.35 (0.83-2.385)           | 1.09 (0.83-3.2)            |

Cohort includes subjects with elevations of TG (in mg/dL: 150 ≤ TG ≤ 450) and/or LDL-C (LDL-C ≥ 100 mg/dL). [1] Age is calculated as an integer value indicating the number of full years passed since birth at screening visit. Baseline for triglycerides is defined as the median of the available measurements taken prior to the administration of evinacumab (including screening). For all other variables, the baseline is defined as the average of Day -1 and Day 1 pre-dose measurements values.

**Table S9. Baseline Demographics and Clinical Characteristics of Healthy Volunteers Treated with IV Evinacumab**

|                                               | Placebo (n=12)   | Evinacumab<br>5 mg/kg (n=10) | Evinacumab<br>10 mg/kg (n=9) | Evinacumab<br>20 mg/kg (n=11) |
|-----------------------------------------------|------------------|------------------------------|------------------------------|-------------------------------|
| Age, mean (SD), yr                            | 41.5 (11.16)     | 49.2 (9.99)                  | 43.1 (8.49)                  | 51.5 (8.31)                   |
| <b>Ethnicity</b>                              |                  |                              |                              |                               |
| Hispanic or Latino, n (%)                     | 7 (58.3%)        | 7 (70.0%)                    | 8 (88.9%)                    | 1 (9.1%)                      |
| Not Hispanic or Latino, n (%)                 | 5 (41.7%)        | 3 (30.0%)                    | 1 (11.1%)                    | 10 (90.9%)                    |
| <b>Race</b>                                   |                  |                              |                              |                               |
| Black or African American, n (%)              | 5 (41.7%)        | 1 (10.0%)                    | 1 (11.1%)                    | 2 (18.2%)                     |
| White, n (%)                                  | 7 (58.3%)        | 9 (90.0%)                    | 8 (88.9%)                    | 9 (81.8%)                     |
| Female, n (%)                                 | 2 (16.7%)        | 5 (50.0%)                    | 0                            | 1 (9.1%)                      |
| Height, mean (SD), cm                         | 175.19 (9.758)   | 164.98 (9.678)               | 174.10 (8.619)               | 172.30 (8.232)                |
| Body mass, mean (SD), kg                      | 92.98 (16.246)   | 79.60 (13.131)               | 85.87 (14.924)               | 86.75 (10.564)                |
| Body mass index, mean (SD), kg/m <sup>2</sup> | 30.16 (3.640)    | 29.21 (3.915)                | 28.27 (4.031)                | 29.16 (1.834)                 |
| <b>Fasting lipids</b>                         |                  |                              |                              |                               |
| LDL-C, direct measured, mean (SD), mg/dl      | 130.44 (23.547)  | 138.77 (28.462)              | 142.56 (20.430)              | 132.64 (29.318)               |
| LDL-C, calculated, mean (SD), mg/dl           | 120.87 (23.896)  | 137.52 (30.876)              | 134.00 (23.688)              | 124.86 (24.540)               |
| Triglycerides, median (Q1-Q3) mg/dl           | 174 (80.5-246)   | 193 (134-212)                | 188 (143-250.5)              | 161.5 (93-244)                |
| HDL-C, mean (SD), mg/dl                       | 42.17 (11.873)   | 42.78 (14.552)               | 44.83 (19.923)               | 43.00 (4.899)                 |
| Non-HDL cholesterol, mean (SD), mg/dl         | 158.40 (23.959)  | 175.68 (42.805)              | 179.50 (29.667)              | 160.55 (23.897)               |
| Total cholesterol, mean (SD), mg/dl           | 200.57 (24.071)  | 218.47 (38.910)              | 224.33 (28.632)              | 203.55 (26.142)               |
| VLDL-cholesterol, median (Q1-Q3) mg/dl        | 37 (18-52.92)    | 38.5 (20.5-56)               | 37.5 (27.5-57)               | 35 (21-49)                    |
| ApoA1, mean (SD), mg/dl                       | 129.79 (21.041)  | 131.48 (21.490)              | 135.72 (34.085)              | 135.55 (11.890)               |
| ApoB, mean (SD), mg/dl                        | 117.49 (16.983)  | 129.33 (31.654)              | 135.00 (16.136)              | 114.59 (16.569)               |
| ApoB/ApoA1 Ratio                              | 0.93 (0.227)     | 1.02 (0.311)                 | 1.05 (0.267)                 | 0.85 (0.129)                  |
| Hs-CRP, median (Q1-Q3) mg/L                   | 2.34 (1.02-3.73) | 2.22 (0.91-4.33)             | 2.35 (1.54-4.47)             | 1.32 (1-2.7)                  |

Cohort includes subjects with elevations of TG (in mg/dL: 150 ≤ TG ≤ 450) and/or LDL-C (LDL-C ≥ 100 mg/dL). [1] Age is calculated as an integer value indicating the number of full years passed since birth at screening visit. Baseline for triglycerides is defined as the median of the available measurements taken prior to the administration of evinacumab (including screening). For all other variables, the baseline is defined as the average of Day -1 and Day 1 pre-dose measurements values.

**Table S10. Summary of Treatment Emergent Adverse Events in Healthy Volunteers Treated with Evinacumab**

|                                                      | SC Regimen       |                               |                                |                               | IV Regimen        |                                 |                                 |                                  | All                           |                                  |                 |
|------------------------------------------------------|------------------|-------------------------------|--------------------------------|-------------------------------|-------------------|---------------------------------|---------------------------------|----------------------------------|-------------------------------|----------------------------------|-----------------|
|                                                      | Placebo<br>(N=9) | Evinacumab<br>75 mg<br>(N=11) | Evinacumab<br>150 mg<br>(N=12) | Evinacumab<br>250 mg<br>(N=9) | Placebo<br>(N=12) | Evinacumab<br>5 mg/kg<br>(N=10) | Evinacumab<br>10 mg/kg<br>(N=9) | Evinacumab<br>20 mg/kg<br>(N=11) | Placebo<br>Combined<br>(N=21) | Evinacumab<br>Combined<br>(N=62) | Total<br>(N=83) |
| Number of TEAEs                                      | 9                | 8                             | 8                              | 11                            | 9                 | 17                              | 9                               | 15                               | 18                            | 68                               | 86              |
| Number of TEAEs related to study drug                | 0                | 4                             | 3                              | 2                             | 1                 | 9                               | 7                               | 3                                | 1                             | 28                               | 29              |
| Number of serious TEAEs                              | 0                | 0                             | 0                              | 0                             | 0                 | 0                               | 0                               | 0                                | 0                             | 0                                | 0               |
| Number of TEAEs resulting in discontinuation [1]     | 0                | 0                             | 0                              | 0                             | 0                 | 0                               | 0                               | 0                                | 0                             | 0                                | 0               |
| Subjects with no TEAEs                               | 5<br>(55.6%)     | 8 (72.7%)                     | 7 (58.3%)                      | 3 (33.3%)                     | 7<br>(58.3%)      | 5 (50.0%)                       | 2 (22.2%)                       | 5 (45.5%)                        | 12<br>(57.1%)                 | 30 (48.4%)                       | 42<br>(50.6%)   |
| Subjects with at least one TEAE                      | 4<br>(44.4%)     | 3 (27.3%)                     | 5 (41.7%)                      | 6 (66.7%)                     | 5<br>(41.7%)      | 5 (50.0%)                       | 7 (77.8%)                       | 6 (54.5%)                        | 9 (42.9%)                     | 32 (51.6%)                       | 41<br>(49.4%)   |
| Subjects with study drug related TEAEs               | 0                | 2 (18.2%)                     | 2 (16.7%)                      | 1 (11.1%)                     | 1<br>(8.3%)       | 3 (30.0%)                       | 5 (55.6%)                       | 2 (18.2%)                        | 1 (4.8%)                      | 15 (24.2%)                       | 16<br>(19.3%)   |
| Subjects with serious TEAEs                          | 0                | 0                             | 0                              | 0                             | 0                 | 0                               | 0                               | 0                                | 0                             | 0                                | 0               |
| Subjects with TEAEs resulting in discontinuation [1] | 0                | 0                             | 0                              | 0                             | 0                 | 0                               | 0                               | 0                                | 0                             | 0                                | 0               |
| Deaths                                               | 0                | 0                             | 0                              | 0                             | 0                 | 0                               | 0                               | 0                                | 0                             | 0                                | 0               |

Abbreviations: IV, intravenous, SC, subcutaneous; TEAE; Treatment Emergent Adverse Events.

[1] Refers to subjects who permanently discontinued study drug (from AE panel).



**Table S11. Summary of TEAEs by System Organ Class and Preferred Term – Subjects in Group A (All Subjects)**

| System Organ Class<br>MedDRA Preferred<br>Term | SC Regimen       |                               |                                |                               | IV Regimen        |                                 |                                 |                                  | All                           |                                  | Total<br>(N=83) |
|------------------------------------------------|------------------|-------------------------------|--------------------------------|-------------------------------|-------------------|---------------------------------|---------------------------------|----------------------------------|-------------------------------|----------------------------------|-----------------|
|                                                | Placebo<br>(N=9) | Evinacumab<br>75 mg<br>(N=11) | Evinacumab<br>150 mg<br>(N=12) | Evinacumab<br>250 mg<br>(N=9) | Placebo<br>(N=12) | Evinacumab<br>5 mg/kg<br>(N=10) | Evinacumab<br>10 mg/kg<br>(N=9) | Evinacumab<br>20 mg/kg<br>(N=11) | Placebo<br>Combined<br>(N=21) | Evinacumab<br>Combined<br>(N=62) |                 |
| Subjects with at least one TEAE                | 4 (44.4%)        | 3 (27.3%)                     | 5 (41.7%)                      | 6 (66.7%)                     | 5 (41.7%)         | 5 (50.0%)                       | 7 (77.8%)                       | 6 (54.5%)                        | 9 (42.9%)                     | 32 (51.6%)                       | 41 (49.4%)      |
| <b>Infections and infestations</b>             | 3 (33.3%)        | 2 (18.2%)                     | 1 (8.3%)                       | 1 (11.1%)                     | 3 (25.0%)         | 1 (10.0%)                       | 0                               | 1 (9.1%)                         | 6 (28.6%)                     | 6 (9.7%)                         | 12 (14.5%)      |
| Upper respiratory tract infection              | 1 (11.1%)        | 1 (9.1%)                      | 1 (8.3%)                       | 1 (11.1%)                     | 0                 | 0                               | 0                               | 1 (9.1%)                         | 1 (4.8%)                      | 4 (6.5%)                         | 5 (6.0%)        |
| Viral upper respiratory tract infection        | 1 (11.1%)        | 1 (9.1%)                      | 0                              | 0                             | 1 (8.3%)          | 0                               | 0                               | 0                                | 2 (9.5%)                      | 1 (1.6%)                         | 3 (3.6%)        |
| Molluscum contagiosum                          | 1 (11.1%)        | 0                             | 0                              | 0                             | 0                 | 0                               | 0                               | 0                                | 1 (4.8%)                      | 0                                | 1 (1.2%)        |
| Pharyngitis                                    | 0                | 0                             | 0                              | 0                             | 0                 | 1 (10.0%)                       | 0                               | 0                                | 0                             | 1 (1.6%)                         | 1 (1.2%)        |
| Rhinitis                                       | 0                | 0                             | 0                              | 0                             | 1 (8.3%)          | 0                               | 0                               | 0                                | 1 (4.8%)                      | 0                                | 1 (1.2%)        |
| Viral rhinitis                                 | 0                | 0                             | 0                              | 0                             | 1 (8.3%)          | 0                               | 0                               | 0                                | 1 (4.8%)                      | 0                                | 1 (1.2%)        |
| <b>Investigations</b>                          | 0                | 1 (9.1%)                      | 0                              | 3 (33.3%)                     | 0                 | 1 (10.0%)                       | 4 (44.4%)                       | 1 (9.1%)                         | 0                             | 10 (16.1%)                       | 10 (12.0%)      |
| Alanine aminotransferase increased             | 0                | 0                             | 0                              | 1 (11.1%)                     | 0                 | 1 (10.0%)                       | 4 (44.4%)                       | 1 (9.1%)                         | 0                             | 7 (11.3%)                        | 7 (8.4%)        |
| Aspartate aminotransferase increased           | 0                | 0                             | 0                              | 1 (11.1%)                     | 0                 | 1 (10.0%)                       | 2 (22.2%)                       | 0                                | 0                             | 4 (6.5%)                         | 4 (4.8%)        |

**Table S11. Summary of TEAEs by System Organ Class and Preferred Term – Subjects in Group A (All Subjects)**

| System Organ Class<br>MedDRA Preferred<br>Term         | SC Regimen       |                               |                                |                               | IV Regimen        |                                 |                                 |                                  | All                           |                                  | Total<br>(N=83) |
|--------------------------------------------------------|------------------|-------------------------------|--------------------------------|-------------------------------|-------------------|---------------------------------|---------------------------------|----------------------------------|-------------------------------|----------------------------------|-----------------|
|                                                        | Placebo<br>(N=9) | Evinacumab<br>75 mg<br>(N=11) | Evinacumab<br>150 mg<br>(N=12) | Evinacumab<br>250 mg<br>(N=9) | Placebo<br>(N=12) | Evinacumab<br>5 mg/kg<br>(N=10) | Evinacumab<br>10 mg/kg<br>(N=9) | Evinacumab<br>20 mg/kg<br>(N=11) | Placebo<br>Combined<br>(N=21) | Evinacumab<br>Combined<br>(N=62) |                 |
| Blood creatine phosphokinase increased                 | 0                | 0                             | 0                              | 2 (22.2%)                     | 0                 | 0                               | 0                               | 0                                | 0                             | 2 (3.2%)                         | 2 (2.4%)        |
| Electrocardiogram T wave abnormal                      | 0                | 1 (9.1%)                      | 0                              | 0                             | 0                 | 0                               | 0                               | 0                                | 0                             | 1 (1.6%)                         | 1 (1.2%)        |
| <b>Musculoskeletal and connective tissue disorders</b> | 0                | 0                             | 2 (16.7%)                      | 2 (22.2%)                     | 1 (8.3%)          | 1 (10.0%)                       | 1 (11.1%)                       | 2 (18.2%)                        | 1 (4.8%)                      | 8 (12.9%)                        | 9 (10.8%)       |
| Myalgia                                                | 0                | 0                             | 0                              | 1 (11.1%)                     | 1 (8.3%)          | 1 (10.0%)                       | 0                               | 0                                | 1 (4.8%)                      | 2 (3.2%)                         | 3 (3.6%)        |
| Arthralgia                                             | 0                | 0                             | 0                              | 0                             | 0                 | 0                               | 1 (11.1%)                       | 1 (9.1%)                         | 0                             | 2 (3.2%)                         | 2 (2.4%)        |
| Back pain                                              | 0                | 0                             | 1 (8.3%)                       | 1 (11.1%)                     | 0                 | 0                               | 0                               | 0                                | 0                             | 2 (3.2%)                         | 2 (2.4%)        |
| Pain in extremity                                      | 0                | 0                             | 1 (8.3%)                       | 0                             | 0                 | 0                               | 0                               | 1 (9.1%)                         | 0                             | 2 (3.2%)                         | 2 (2.4%)        |
| <b>Nervous system disorders</b>                        | 0                | 2 (18.2%)                     | 1 (8.3%)                       | 0                             | 1 (8.3%)          | 2 (20.0%)                       | 1 (11.1%)                       | 1 (9.1%)                         | 1 (4.8%)                      | 7 (11.3%)                        | 8 (9.6%)        |
| Headache                                               | 0                | 2 (18.2%)                     | 1 (8.3%)                       | 0                             | 0                 | 2 (20.0%)                       | 1 (11.1%)                       | 1 (9.1%)                         | 0                             | 7 (11.3%)                        | 7 (8.4%)        |
| Dizziness                                              | 0                | 0                             | 0                              | 0                             | 0                 | 1 (10.0%)                       | 0                               | 0                                | 0                             | 1 (1.6%)                         | 1 (1.2%)        |
| Paraesthesia                                           | 0                | 0                             | 0                              | 0                             | 1 (8.3%)          | 0                               | 0                               | 0                                | 1 (4.8%)                      | 0                                | 1 (1.2%)        |
| <b>Gastrointestinal disorders</b>                      | 0                | 0                             | 2 (16.7%)                      | 1 (11.1%)                     | 0                 | 1 (10.0%)                       | 1 (11.1%)                       | 1 (9.1%)                         | 0                             | 6 (9.7%)                         | 6 (7.2%)        |
| Abdominal pain                                         | 0                | 0                             | 1 (8.3%)                       | 0                             | 0                 | 0                               | 0                               | 1 (9.1%)                         | 0                             | 2 (3.2%)                         | 2 (2.4%)        |
| Constipation                                           | 0                | 0                             | 1 (8.3%)                       | 1 (11.1%)                     | 0                 | 0                               | 0                               | 0                                | 0                             | 2 (3.2%)                         | 2 (2.4%)        |
| Dyspepsia                                              | 0                | 0                             | 0                              | 0                             | 0                 | 1 (10.0%)                       | 0                               | 0                                | 0                             | 1 (1.6%)                         | 1 (1.2%)        |

**Table S11. Summary of TEAEs by System Organ Class and Preferred Term – Subjects in Group A (All Subjects)**

| System Organ Class<br>MedDRA Preferred<br>Term                     | SC Regimen       |                               |                                |                               | IV Regimen        |                                 |                                 |                                  | All                           |                                  | Total<br>(N=83) |
|--------------------------------------------------------------------|------------------|-------------------------------|--------------------------------|-------------------------------|-------------------|---------------------------------|---------------------------------|----------------------------------|-------------------------------|----------------------------------|-----------------|
|                                                                    | Placebo<br>(N=9) | Evinacumab<br>75 mg<br>(N=11) | Evinacumab<br>150 mg<br>(N=12) | Evinacumab<br>250 mg<br>(N=9) | Placebo<br>(N=12) | Evinacumab<br>5 mg/kg<br>(N=10) | Evinacumab<br>10 mg/kg<br>(N=9) | Evinacumab<br>20 mg/kg<br>(N=11) | Placebo<br>Combined<br>(N=21) | Evinacumab<br>Combined<br>(N=62) |                 |
| Toothache                                                          | 0                | 0                             | 0                              | 0                             | 0                 | 0                               | 1 (11.1%)                       | 0                                | 0                             | 1 (1.6%)                         | 1 (1.2%)        |
| <b>Skin and<br/>subcutaneous<br/>tissue disorders</b>              | 0                | 1 (9.1%)                      | 0                              | 0                             | 1 (8.3%)          | 1 (10.0%)                       | 0                               | 2 (18.2%)                        | 1 (4.8%)                      | 4 (6.5%)                         | 5 (6.0%)        |
| Dermatitis<br>contact                                              | 0                | 0                             | 0                              | 0                             | 0                 | 0                               | 0                               | 2 (18.2%)                        | 0                             | 2 (3.2%)                         | 2 (2.4%)        |
| Alopecia                                                           | 0                | 0                             | 0                              | 0                             | 0                 | 1 (10.0%)                       | 0                               | 0                                | 0                             | 1 (1.6%)                         | 1 (1.2%)        |
| Dermatitis                                                         | 0                | 0                             | 0                              | 0                             | 0                 | 0                               | 0                               | 1 (9.1%)                         | 0                             | 1 (1.6%)                         | 1 (1.2%)        |
| Hyperhidrosis                                                      | 0                | 0                             | 0                              | 0                             | 0                 | 1 (10.0%)                       | 0                               | 0                                | 0                             | 1 (1.6%)                         | 1 (1.2%)        |
| Pruritus                                                           | 0                | 1 (9.1%)                      | 0                              | 0                             | 0                 | 0                               | 0                               | 0                                | 0                             | 1 (1.6%)                         | 1 (1.2%)        |
| Rash                                                               | 0                | 0                             | 0                              | 0                             | 1 (8.3%)          | 0                               | 0                               | 0                                | 1 (4.8%)                      | 0                                | 1 (1.2%)        |
| Skin irritation                                                    | 0                | 0                             | 0                              | 0                             | 1 (8.3%)          | 0                               | 0                               | 0                                | 1 (4.8%)                      | 0                                | 1 (1.2%)        |
| <b>Injury, poisoning<br/>and procedural<br/>complications</b>      | 0                | 0                             | 1 (8.3%)                       | 0                             | 2 (16.7%)         | 0                               | 0                               | 1 (9.1%)                         | 2 (9.5%)                      | 2 (3.2%)                         | 4 (4.8%)        |
| Excoriation                                                        | 0                | 0                             | 1 (8.3%)                       | 0                             | 1 (8.3%)          | 0                               | 0                               | 0                                | 1 (4.8%)                      | 1 (1.6%)                         | 2 (2.4%)        |
| Ligament sprain                                                    | 0                | 0                             | 0                              | 0                             | 1 (8.3%)          | 0                               | 0                               | 0                                | 1 (4.8%)                      | 0                                | 1 (1.2%)        |
| Muscle strain                                                      | 0                | 0                             | 0                              | 0                             | 0                 | 0                               | 0                               | 1 (9.1%)                         | 0                             | 1 (1.6%)                         | 1 (1.2%)        |
| <b>Respiratory,<br/>thoracic and<br/>mediastinal<br/>disorders</b> | 0                | 0                             | 0                              | 2 (22.2%)                     | 0                 | 1 (10.0%)                       | 0                               | 1 (9.1%)                         | 0                             | 4 (6.5%)                         | 4 (4.8%)        |

**Table S11. Summary of TEAEs by System Organ Class and Preferred Term – Subjects in Group A (All Subjects)**

| System Organ Class<br>MedDRA Preferred<br>Term                      | SC Regimen       |                               |                                | IV Regimen                    |                   |                                 | All                             |                                  | Total<br>(N=83) |                               |                                  |
|---------------------------------------------------------------------|------------------|-------------------------------|--------------------------------|-------------------------------|-------------------|---------------------------------|---------------------------------|----------------------------------|-----------------|-------------------------------|----------------------------------|
|                                                                     | Placebo<br>(N=9) | Evinacumab<br>75 mg<br>(N=11) | Evinacumab<br>150 mg<br>(N=12) | Evinacumab<br>250 mg<br>(N=9) | Placebo<br>(N=12) | Evinacumab<br>5 mg/kg<br>(N=10) | Evinacumab<br>10 mg/kg<br>(N=9) | Evinacumab<br>20 mg/kg<br>(N=11) |                 | Placebo<br>Combined<br>(N=21) | Evinacumab<br>Combined<br>(N=62) |
| Rhinorrhoea                                                         | 0                | 0                             | 0                              | 2 (22.2%)                     | 0                 | 0                               | 0                               | 0                                | 0               | 2 (3.2%)                      | 2 (2.4%)                         |
| Cough                                                               | 0                | 0                             | 0                              | 0                             | 0                 | 1 (10.0%)                       | 0                               | 0                                | 0               | 1 (1.6%)                      | 1 (1.2%)                         |
| Oropharyngeal<br>pain                                               | 0                | 0                             | 0                              | 0                             | 0                 | 0                               | 0                               | 1 (9.1%)                         | 0               | 1 (1.6%)                      | 1 (1.2%)                         |
| Respiratory tract<br>congestion                                     | 0                | 0                             | 0                              | 0                             | 0                 | 1 (10.0%)                       | 0                               | 0                                | 0               | 1 (1.6%)                      | 1 (1.2%)                         |
| Sinus congestion                                                    | 0                | 0                             | 0                              | 0                             | 0                 | 1 (10.0%)                       | 0                               | 0                                | 0               | 1 (1.6%)                      | 1 (1.2%)                         |
| <b>Blood and<br/>lymphatic system<br/>disorders</b>                 | 1 (11.1%)        | 0                             | 0                              | 1 (11.1%)                     | 0                 | 0                               | 0                               | 1 (9.1%)                         | 1 (4.8%)        | 2 (3.2%)                      | 3 (3.6%)                         |
| Anaemia                                                             | 0                | 0                             | 0                              | 1 (11.1%)                     | 0                 | 0                               | 0                               | 0                                | 0               | 1 (1.6%)                      | 1 (1.2%)                         |
| Leukopenia                                                          | 0                | 0                             | 0                              | 0                             | 0                 | 0                               | 0                               | 1 (9.1%)                         | 0               | 1 (1.6%)                      | 1 (1.2%)                         |
| Neutropenia                                                         | 0                | 0                             | 0                              | 0                             | 0                 | 0                               | 0                               | 1 (9.1%)                         | 0               | 1 (1.6%)                      | 1 (1.2%)                         |
| Neutrophilia                                                        | 1 (11.1%)        | 0                             | 0                              | 0                             | 0                 | 0                               | 0                               | 0                                | 1 (4.8%)        | 0                             | 1 (1.2%)                         |
| <b>General disorders<br/>and administration<br/>site conditions</b> | 1 (11.1%)        | 1 (9.1%)                      | 0                              | 0                             | 0                 | 0                               | 0                               | 1 (9.1%)                         | 1 (4.8%)        | 2 (3.2%)                      | 3 (3.6%)                         |
| Asthenia                                                            | 1 (11.1%)        | 0                             | 0                              | 0                             | 0                 | 0                               | 0                               | 0                                | 1 (4.8%)        | 0                             | 1 (1.2%)                         |
| Chest pain                                                          | 0                | 0                             | 0                              | 0                             | 0                 | 0                               | 0                               | 1 (9.1%)                         | 0               | 1 (1.6%)                      | 1 (1.2%)                         |
| Chills                                                              | 0                | 0                             | 0                              | 0                             | 0                 | 0                               | 0                               | 1 (9.1%)                         | 0               | 1 (1.6%)                      | 1 (1.2%)                         |
| Fatigue                                                             | 1 (11.1%)        | 0                             | 0                              | 0                             | 0                 | 0                               | 0                               | 0                                | 1 (4.8%)        | 0                             | 1 (1.2%)                         |
| Pyrexia                                                             | 0                | 1 (9.1%)                      | 0                              | 0                             | 0                 | 0                               | 0                               | 0                                | 0               | 1 (1.6%)                      | 1 (1.2%)                         |

**Table S11. Summary of TEAEs by System Organ Class and Preferred Term – Subjects in Group A (All Subjects)**

| System Organ Class<br>MedDRA Preferred<br>Term          | SC Regimen       |                               |                                | IV Regimen                    |                   |                                 | All                             |                                  | Total<br>(N=83) |                               |                                  |
|---------------------------------------------------------|------------------|-------------------------------|--------------------------------|-------------------------------|-------------------|---------------------------------|---------------------------------|----------------------------------|-----------------|-------------------------------|----------------------------------|
|                                                         | Placebo<br>(N=9) | Evinacumab<br>75 mg<br>(N=11) | Evinacumab<br>150 mg<br>(N=12) | Evinacumab<br>250 mg<br>(N=9) | Placebo<br>(N=12) | Evinacumab<br>5 mg/kg<br>(N=10) | Evinacumab<br>10 mg/kg<br>(N=9) | Evinacumab<br>20 mg/kg<br>(N=11) |                 | Placebo<br>Combined<br>(N=21) | Evinacumab<br>Combined<br>(N=62) |
| Cardiac disorders                                       | 1 (11.1%)        | 0                             | 0                              | 0                             | 0                 | 0                               | 0                               | 0                                | 1 (4.8%)        | 0                             | 1 (1.2%)                         |
| Palpitations                                            | 1 (11.1%)        | 0                             | 0                              | 0                             | 0                 | 0                               | 0                               | 0                                | 1 (4.8%)        | 0                             | 1 (1.2%)                         |
| <b>Reproductive<br/>system and breast<br/>disorders</b> | 0                | 0                             | 1 (8.3%)                       | 0                             | 0                 | 0                               | 0                               | 0                                | 0               | 1 (1.6%)                      | 1 (1.2%)                         |
| Dysmenorrhoea                                           | 0                | 0                             | 1 (8.3%)                       | 0                             | 0                 | 0                               | 0                               | 0                                | 0               | 1 (1.6%)                      | 1 (1.2%)                         |
| <b>Vascular disorders</b>                               | 0                | 0                             | 0                              | 0                             | 0                 | 1 (10.0%)                       | 0                               | 0                                | 0               | 1 (1.6%)                      | 1 (1.2%)                         |
| Flushing                                                | 0                | 0                             | 0                              | 0                             | 0                 | 1 (10.0%)                       | 0                               | 0                                | 0               | 1 (1.6%)                      | 1 (1.2%)                         |

**Table S12. Summary of Triglyceride (mg/dL) Percent Change from Baseline by Dose Level by Visit Subjects in Group A (Safety Analysis Set) Treated with SC Evinacumab**

|                                                         | Placebo<br>(N=9)    | Evinacumab<br>75 mg<br>(N=11) | Evinacumab<br>150 mg<br>(N=12) | Evinacumab<br>250 mg<br>(N=9) |
|---------------------------------------------------------|---------------------|-------------------------------|--------------------------------|-------------------------------|
| <b>Triglycerides (Day 4)</b>                            |                     |                               |                                |                               |
| N                                                       | 9                   | 11                            | 12                             | 9                             |
| Median (Q1:Q3) at Day 1 (baseline)                      | 153.0 (126.0:248.0) | 156.0 (132.0:220.0)           | 188.5 (120.0:258.5)            | 182.0 (148.0:288.0)           |
| Median (Q1:Q3) at Day 4                                 | 169 (160.0 : 208.0) | 189 (134.0 : 197.0)           | 105.5 (95.0 : 212.0)           | 96 (54.0 : 154.0)             |
| Percent change from baseline Median (Q1 : Q3)           | 25.3 (13.4 : 31.4)  | -1 (-13.4 : 8.9)              | -29.1 (-47.3 : 12.3)           | -51.1 (-60.1 : -30.2)         |
| Percent change from baseline Difference v.s.<br>placebo |                     |                               |                                |                               |
| Median Difference                                       |                     | -20.84 (14.986)               | -40.79 (20.057)                | -64.42 (19.454)               |
| 95% C.I.                                                |                     | (-48.11,10.63)                | (-71.60, 7.02)                 | (-91.46,-15.20)               |
| P-value                                                 |                     | 0.2121                        | 0.0168                         | 0.0017                        |
| <b>Triglycerides (Day 15)</b>                           |                     |                               |                                |                               |
| N                                                       | 7                   | 10                            | 12                             | 7                             |
| Median (Q1:Q3) at Day 15                                | 144 (93.0 : 250.0)  | 141 (122.0 : 236.0)           | 169.5 (95.5 : 219.0)           | 118 (104.0 : 198.0)           |
| Percent change from baseline Median (Q1 : Q3)           | -3.8 (-53.7 : 5.1)  | -10.9 (-23.1 : 29.3)          | -10.9 (-20.4 : 5.3)            | -32.2 (-43.4 : 12.8)          |
| Percent change from baseline Difference v.s.<br>placebo |                     |                               |                                |                               |
| Median Difference                                       |                     | 5.98 (23.147)                 | 4.14 (20.419)                  | -9.57 (24.082)                |
| 95% C.I.                                                |                     | (-29.68, 61.05)               | (-26.79,53.25)                 | (-59.33, 35.07)               |
| P-value                                                 |                     | 0.8038                        | 0.8642                         | 0.6173                        |

Abbreviations: C.I., confidence interval; Q1, quartile 1; Q3, quartile 3, SC, subcutaneous.

**Table S13. Summary of Triglyceride (mg/dL) Percent Change from Baseline by Dose Level by Visit Subjects in Group A (Safety Analysis Set) Treated with IV Evinacumab**

|                                                         | Placebo<br>(N=12)    | Evinacumab<br>5 mg/kg<br>(N=10) | Evinacumab<br>10 mg/kg<br>(N=9) | Evinacumab<br>20 mg/kg<br>(N=11) |
|---------------------------------------------------------|----------------------|---------------------------------|---------------------------------|----------------------------------|
| <b>Triglycerides (Day 4)</b>                            |                      |                                 |                                 |                                  |
| N                                                       | 12                   | 10                              | 9                               | 11                               |
| Median (Q1:Q3) at Day 1 (Baseline)                      | 173.5 (82.5 : 243.5) | 190.0 (118.0 : 230.0)           | 197.0 (130.0 : 327.0)           | 158.0 (101.0 : 271.0)            |
| Median (Q1:Q3) at Day 4                                 | 183.5 (91.0 : 209.5) | 65.5 (49.0 : 100.0)             | 49 (31.0 : 65.0)                | 47 (32.0 : 58.0)                 |
| Percent change from baseline Median (Q1:Q3)             | 9 (-5.1 : 23.4)      | -64.1 (-68.9 : -63.5)           | -74.4 (-76.8 : -71.1)           | -75 (-80.2 : -67.1)              |
| Percent change from baseline Difference v.s.<br>placebo |                      |                                 |                                 |                                  |
| Median Difference                                       |                      | -71.04 (7.965)                  | -79.62 (8.504)                  | -76.01 (8.999)                   |
| 95% C.I.                                                |                      | (-88.99, -57.77)                | (-98.66, -65.33)                | (-97.29, -62.02)                 |
| P-value                                                 |                      | <0.0001                         | <0.0001                         | <0.0001                          |
| <b>Triglycerides (Day 15)</b>                           |                      |                                 |                                 |                                  |
| N                                                       | 11                   | 9                               | 9                               | 11                               |
| Median (Q1 : Q3) at Day 15                              | 149 (88.0 : 225.0)   | 88 (59.0 : 102.0)               | 71 (46.0 : 121.0)               | 58 (38.0 : 64.0)                 |
| Percent change from baseline Median (Q1 : Q3)           | -18.4 (-19.3 : -5.1) | -49.4 (-51.9 : -34.3)           | -60.1 (-71.3 : -55.0)           | -63.1 (-69.6 : -55.7)            |
| Percent change from baseline Difference v.s.<br>placebo |                      |                                 |                                 |                                  |
| Median Difference                                       |                      | -31.01 (8.956)                  | -48.72 (7.148)                  | -50.43 (6.157)                   |
| 95% C.I.                                                |                      | (-46.35, -11.24)                | (-60.17, -32.15)                | (-62.79, -38.65)                 |
| P-value                                                 |                      | 0.0026                          | <0.0001                         | <0.0001                          |

Abbreviations: C.I., confidence interval; IV, intravenous; Q1, quartile 1; Q3, quartile 3.

**Table S14. Summary of LDL-C (mg/dL) Percent Change from Baseline by Dose Level by Visit Subjects in Group A (Safety Analysis Set) Treated with SC Evinacumab**

|                                        | Placebo<br>(N=9) | Evinacumab<br>75 mg<br>(N=11) | Evinacumab<br>150 mg<br>(N=12) | Evinacumab<br>250 mg<br>(N=9) |
|----------------------------------------|------------------|-------------------------------|--------------------------------|-------------------------------|
| <b>LDL Cholesterol (Day 4)-Direct</b>  |                  |                               |                                |                               |
| N                                      | 9                | 11                            | 12                             | 9                             |
| Mean (SD) at Day 1 (Baseline)          | 148.8 (24.93)    | 141.8 (41.21)                 | 138.5 (33.48)                  | 150.9 (28.00)                 |
| Mean (SD) at Day 4                     | 140.3 (19.76)    | 136.3 (28.59)                 | 122.3 (23.84)                  | 135.3 (33.86)                 |
| Percent change from baseline           |                  |                               |                                |                               |
| Mean (SD)                              | -0.8 (17.08)     | 1.6 (27.76)                   | -8.4 (14.21)                   | -8.6 (20.11)                  |
| LS Mean (SE)                           | -0.09 (5.918)    | 0.78 (5.355)                  | -10.26 (5.147)                 | -5.85 (5.963)                 |
| LS Mean Difference vs. Placebo (SE)    |                  | 0.86 (7.986)                  | -10.17 (7.855)                 | -5.77 (8.385)                 |
| 95% C.I.                               |                  | (17.06, -15.33)               | (5.76, -26.10)                 | (11.24, -22.77)               |
| P-value                                |                  | 0.9144                        | 0.2037                         | 0.496                         |
| <b>LDL Cholesterol (Day 15)-Direct</b> |                  |                               |                                |                               |
| N                                      | 7                | 10                            | 12                             | 7                             |
| Mean (SD) at Day 15                    | 144.0 (18.80)    | 136.8 (39.72)                 | 127.2 (19.28)                  | 129.7 (31.76)                 |
| Percent change from baseline           |                  |                               |                                |                               |
| Mean (SD)                              | 2.8 (12.80)      | -2.1 (11.55)                  | -3.9 (16.98)                   | -17.7 (20.22)                 |
| LS Mean (SE)                           | 2.61 (5.336)     | -2.64 (4.468)                 | -5.34 (4.107)                  | -14.13 (5.476)                |
| LS Mean Difference vs. Placebo (SE)    |                  | -5.25 (6.957)                 | -7.95 (6.728)                  | -16.74 (7.657)                |
| 95% C.I.                               |                  | (8.94, -19.44)                | (5.77, -21.67)                 | (-1.12, -32.36)               |
| P-value                                |                  | 0.4558                        | 0.2462                         | 0.0365                        |

Abbreviations: C.I., confidence interval; LS, least squares; SC, subcutaneous; SD, standard deviation; SE, standard error.



**Table S15. Summary of LDL-C (mg/dL) Percent Change from Baseline by Dose Level by Visit Subjects in Group A (Safety Analysis Set) Treated with IV Evinacumab**

|                                        | <b>Placebo<br/>(N=12)</b> | <b>Evinacumab<br/>5 mg/kg<br/>(N=10)</b> | <b>Evinacumab<br/>10 mg/kg<br/>(N=9)</b> | <b>Evinacumab<br/>20 mg/kg<br/>(N=11)</b> |
|----------------------------------------|---------------------------|------------------------------------------|------------------------------------------|-------------------------------------------|
| <b>LDL Cholesterol (Day 4)-Direct</b>  |                           |                                          |                                          |                                           |
| N                                      | 11                        | 10                                       | 9                                        | 11                                        |
| Mean (SD) at Day 1 (Baseline)          | 134.6 (23.79)             | 140.6 (30.32)                            | 142.7 (20.54)                            | 134.7 (26.88)                             |
| Mean (SD) at Day 4                     | 138.8 (25.95)             | 131.3 (55.25)                            | 118.9 (34.12)                            | 115.6 (29.28)                             |
| Percent change from baseline           |                           |                                          |                                          |                                           |
| Mean (SD)                              | 6.9 (12.11)               | -7.8 (29.29)                             | -16.6 (21.45)                            | -12.0 (18.09)                             |
| LS Mean (SE)                           | 7.20 (6.078)              | -8.00 (6.630)                            | -17.01 (7.034)                           | -11.86 (6.321)                            |
| LS Mean Difference vs. Placebo (SE)    |                           | -15.19 (9.026)                           | -24.20 (9.363)                           | -19.06 (8.739)                            |
| 95% C.I.                               |                           | (3.09, -33.48)                           | (-5.23, -43.17)                          | (-1.35, -36.76)                           |
| P-value                                |                           | 0.1007                                   | 0.0138                                   | 0.0356                                    |
| <b>LDL Cholesterol (Day 15)-Direct</b> |                           |                                          |                                          |                                           |
| N                                      | 11                        | 9                                        | 9                                        | 11                                        |
| Mean (SD) at Day 15                    | 125.3 (25.82)             | 116.1 (39.52)                            | 111.2 (30.67)                            | 94.2 (24.66)                              |
| Percent change from baseline           |                           |                                          |                                          |                                           |
| Mean (SD)                              | -4.5 (12.55)              | -16.8 (15.56)                            | -20.1 (25.80)                            | -27.8 (17.03)                             |
| LS Mean (SE)                           | -5.00 (5.456)             | -16.52 (6.013)                           | -19.31 (6.060)                           | -28.19 (5.446)                            |
| LS Mean Difference vs. Placebo (SE)    |                           | -11.52 (8.133)                           | -14.31 (8.200)                           | -23.19 (7.688)                            |
| 95% C.I.                               |                           | (4.99, -28.03)                           | (2.34, -30.96)                           | (-7.59, -38.80)                           |
| P-value                                |                           | 0.1656                                   | 0.0898                                   | 0.0047                                    |

Abbreviations: C.I., confidence interval; IV, intravenous; LS, least squares; SD, standard deviation; SE, standard error.

**Table S16. Summary of HDL-C (mg/dL) Percent Change from Baseline by Dose Level by Visit Subjects in Group A (Safety Analysis Set) Treated with SC Evinacumab**

|                                     | Placebo<br>(N=9) | Evinacumab<br>75 mg<br>(N=11) | Evinacumab<br>150 mg<br>(N=12) | Evinacumab<br>250 mg<br>(N=9) |
|-------------------------------------|------------------|-------------------------------|--------------------------------|-------------------------------|
| <b>HDL Cholesterol (Day 4)</b>      |                  |                               |                                |                               |
| N                                   | 9                | 11                            | 12                             | 9                             |
| Mean (SD) at Day 1 (Baseline)       | 47.7 (7.81)      | 48.4 (12.55)                  | 46.1 (15.56)                   | 53.0 (22.46)                  |
| Mean (SD) at Day 4                  | 47.6 (9.17)      | 44.8 (9.87)                   | 47.3 (20.38)                   | 51.0 (13.66)                  |
| Percent change from baseline        |                  |                               |                                |                               |
| Mean (SD)                           | -0.7 (10.20)     | -7.3 (14.22)                  | -2.3 (13.37)                   | -2.7 (16.84)                  |
| LS Mean (SE)                        | -0.96 (4.586)    | -7.34 (4.143)                 | -2.66 (3.979)                  | -1.85 (4.633)                 |
| LS Mean Difference vs. Placebo (SE) |                  | -6.38 (6.179)                 | -1.70 (6.060)                  | -0.89 (6.543)                 |
| 95% C.I.                            |                  | (6.15, -18.91)                | (10.59, -13.99)                | (12.38, -14.16)               |
| P-value                             |                  | 0.3087                        | 0.781                          | 0.8922                        |
| <b>HDL Cholesterol (Day 15)</b>     |                  |                               |                                |                               |
| N                                   | 7                | 10                            | 12                             | 7                             |
| Mean (SD) at Day 15                 | 49.4 (8.42)      | 51.6 (13.13)                  | 44.3 (15.29)                   | 42.1 (5.87)                   |
| Percent change from baseline        |                  |                               |                                |                               |
| Mean (SD)                           | 1.4 (9.67)       | 3.2 (13.63)                   | -6.5 (7.21)                    | -11.5 (4.06)                  |
| LS Mean (SE)                        | 1.49 (3.619)     | 3.39 (3.037)                  | -6.67 (2.768)                  | -11.62 (3.620)                |
| LS Mean Difference vs. Placebo (SE) |                  | 1.91 (4.721)                  | -8.16 (4.558)                  | -13.11 (5.120)                |
| 95% C.I.                            |                  | (11.53, -7.72)                | (1.14, -17.45)                 | (-2.67, -23.55)               |
| P-value                             |                  | 0.6893                        | 0.0834                         | 0.0155                        |

Abbreviations: C.I., confidence interval; LS, least squares; SC, subcutaneous; SD, standard deviation; SE, standard error.

**Table S17. Summary of HDL-C (mg/dL) Percent Change from Baseline by Dose Level by Visit Subjects in Group A (Safety Analysis Set) Treated with IV Evinacumab**

|                                     | Placebo<br>(N=12) | Evinacumab<br>5 mg/kg<br>(N=10) | Evinacumab<br>10 mg/kg<br>(N=9) | Evinacumab<br>20 mg/kg<br>(N=11) |
|-------------------------------------|-------------------|---------------------------------|---------------------------------|----------------------------------|
| <b>HDL Cholesterol (Day 4)</b>      |                   |                                 |                                 |                                  |
| N                                   | 12                | 10                              | 9                               | 11                               |
| Mean (SD) at Day 1 (Baseline)       | 41.5 (11.57)      | 43.6 (14.82)                    | 44.0 (19.47)                    | 43.3 (6.59)                      |
| Mean (SD) at Day 4                  | 43.9 (12.14)      | 41.8 (17.76)                    | 40.0 (17.58)                    | 40.0 (11.10)                     |
| Percent change from baseline        |                   |                                 |                                 |                                  |
| Mean (SD)                           | 4.5 (7.86)        | -4.3 (17.99)                    | -10.9 (12.50)                   | -6.7 (23.62)                     |
| LS Mean (SE)                        | 4.58 (4.834)      | -4.32 (5.292)                   | -11.04 (5.589)                  | -6.74 (5.045)                    |
| LS Mean Difference vs. Placebo (SE) |                   | -8.89 (7.166)                   | -15.62 (7.398)                  | -11.31 (6.987)                   |
| 95% C.I.                            |                   | (5.63, -23.41)                  | (-0.63, -30.61)                 | (2.84, -25.47)                   |
| P-value                             |                   | 0.2224                          | 0.0415                          | 0.1138                           |
| <b>HDL Cholesterol (Day 15)</b>     |                   |                                 |                                 |                                  |
| N                                   | 11                | 9                               | 9                               | 11                               |
| Mean (SD) at Day 15                 | 41.5 (13.38)      | 37.1 (15.07)                    | 31.9 (11.58)                    | 34.0 (6.34)                      |
| Percent change from baseline        |                   |                                 |                                 |                                  |
| Mean (SD)                           | -1.8 (13.50)      | -17.7 (15.26)                   | -27.3 (10.28)                   | -20.2 (16.38)                    |
| LS Mean (SE)                        | -1.85 (4.326)     | -17.63 (4.779)                  | -27.19 (4.783)                  | -20.21 (4.322)                   |
| LS Mean Difference vs. Placebo (SE) |                   | -15.79 (6.451)                  | -25.34 (6.457)                  | -18.36 (6.112)                   |
| 95% C.I.                            |                   | (-2.69, -28.88)                 | (-12.24, -38.45)                | (-5.96, -30.77)                  |
| P-value                             |                   | 0.0196                          | 0.0004                          | 0.0049                           |

Abbreviations: C.I., confidence interval; IV, intravenous; LS, least squares; SD, standard deviation; SE, standard error.

## **References**

1. Baigent C, Keech A, Kearney PM, et al. Efficacy and safety of cholesterol-lowering treatment: prospective meta-analysis of data from 90,056 participants in 14 randomised trials of statins. *Lancet* 2005;366:1267-78.
2. Dewey FE, Gusarova V, O'Dushlaine C, et al. Inactivating Variants in ANGPTL4 and Risk of Coronary Artery Disease. *N Engl J Med* 2016;374:1123-33.
3. Jorgensen AB, Frikke-Schmidt R, West AS, Grande P, Nordestgaard BG, Tybjaerg-Hansen A. Genetically elevated non-fasting triglycerides and calculated remnant cholesterol as causal risk factors for myocardial infarction. *Eur Heart J* 2013;34:1826-33.
4. Varbo A, Benn M, Tybjaerg-Hansen A, Jorgensen AB, Frikke-Schmidt R, Nordestgaard BG. Remnant cholesterol as a causal risk factor for ischemic heart disease. *J Am Coll Cardiol* 2013;61:427-36.
5. Kraus WE, Granger CB, Sketch MH, Jr., et al. A Guide for a Cardiovascular Genomics Biorepository: the CATHGEN Experience. *J Cardiovasc Transl Res* 2015;8:449-57.
6. Kuo JZ, Sheu WH, Assimes TL, et al. Trans-ethnic fine mapping identifies a novel independent locus at the 3' end of CDKAL1 and novel variants of several susceptibility loci for type 2 diabetes in a Han Chinese population. *Diabetologia* 2013;56:2619-28.
7. Sheu WH, Kuo JZ, Lee IT, et al. Genome-wide association study in a Chinese population with diabetic retinopathy. *Hum Mol Genet* 2013;22:3165-73.
8. Chang YC, Chiu YF, Liu PH, et al. Replication of genome-wide association signals of type 2 diabetes in Han Chinese in a prospective cohort. *Clin Endocrinol (Oxf)* 2012;76:365-72.
9. Dewey FE, Murray MF, Overton JD, et al. Distribution and clinical impact of functional variants in 50,726 whole-exome sequences from the DiscovEHR study. *Science* 2016;354:aaf6814.

10. McKenna A, Hanna M, Banks E, et al. The Genome Analysis Toolkit: a MapReduce framework for analyzing next-generation DNA sequencing data. *Genome Res* 2010;20:1297-303.
11. Cingolani P, Platts A, Wang le L, et al. A program for annotating and predicting the effects of single nucleotide polymorphisms, SnpEff: SNPs in the genome of *Drosophila melanogaster* strain w1118; iso-2; iso-3. *Fly (Austin)* 2012;6:80-92.
12. Yang J, Lee SH, Goddard ME, Visscher PM. GCTA: a tool for genome-wide complex trait analysis. *Am J Hum Genet* 2011;88:76-82.
13. Heinze G, Schemper M. A solution to the problem of separation in logistic regression. *Stat Med* 2002;21:2409-19.
14. Gusarova V, Alexa CA, Wang Y, et al. ANGPTL3 blockade with a human monoclonal antibody reduces plasma lipids in dyslipidemic mice and monkeys. *J Lipid Res* 2015;56:1308-17.
15. Murphy AJ, Macdonald LE, Stevens S, et al. Mice with megabase humanization of their immunoglobulin genes generate antibodies as efficiently as normal mice. *Proc Natl Acad Sci U S A* 2014;111:5153-8.
16. Labrijn AF, Buijsse AO, van den Bremer ET, et al. Therapeutic IgG4 antibodies engage in Fab-arm exchange with endogenous human IgG4 in vivo. *Nat Biotechnol* 2009;27:767-71.
17. van Vlijmen BJ, van den Maagdenberg AM, Gijbels MJ, et al. Diet-induced hyperlipoproteinemia and atherosclerosis in apolipoprotein E3-Leiden transgenic mice. *J Clin Invest* 1994;93:1403-10.
18. Macdonald LE, Karow M, Stevens S, et al. Precise and in situ genetic humanization of 6 Mb of mouse immunoglobulin genes. *Proc Natl Acad Sci U S A* 2014;111:5147-52.
19. van Vlijmen BJ, van 't Hof HB, Mol MJ, et al. Modulation of very low density lipoprotein production and clearance contributes to age- and gender- dependent hyperlipoproteinemia in apolipoprotein E3-Leiden transgenic mice. *J Clin Invest* 1996;97:1184-92.

20. Delsing DJ, Offerman EH, van Duyvenvoorde W, et al. Acyl-CoA:cholesterol acyltransferase inhibitor avasimibe reduces atherosclerosis in addition to its cholesterol-lowering effect in ApoE\*3-Leiden mice. *Circulation* 2001;103:1778-86.
21. Kuhnast S, van der Hoorn JW, van den Hoek AM, et al. Aliskiren inhibits atherosclerosis development and improves plaque stability in APOE\*3Leiden.CETP transgenic mice with or without treatment with atorvastatin. *J Hypertens* 2012;30:107-16.
22. Stary HC, Chandler AB, Dinsmore RE, et al. A definition of advanced types of atherosclerotic lesions and a histological classification of atherosclerosis. A report from the Committee on Vascular Lesions of the Council on Arteriosclerosis, American Heart Association. *Arterioscler Thromb Vasc Biol* 1995;15:1512-31.
23. Kuhnast S, Louwe MC, Heemskerk MM, et al. Niacin Reduces Atherosclerosis Development in APOE\*3Leiden.CETP Mice Mainly by Reducing NonHDL-Cholesterol. *PLoS One* 2013;8:e66467.
